# Supplementary material for: Role of aromatic vs. aliphatic amine for the variation of structural, electrical and catalytic behaviors in a series of silver phosphonate extended hybrid solids
Source: Royal Society of Chemistry journal article supplement (doi:10.1039/d0dt02796k), 2020-01-01
Supplement: d0dt02796k1.pdf [file d0dt02796k1.pdf]

**ELECTRONIC SUPPORTING INFORMATION**

**Role of aromatic vs aliphatic amine for variation of structural,  
electrical and catalytic behaviors in a series of silver phosphonate  
extended hybrid solids**

Tanmay Rom and Avijit Kumar Paul\*

*Department of Chemistry, National Institute of Technology Kurukshetra, Kurukshetra-136119, Haryana, India.*

E-mail: [apaul@nitkr.ac.in](mailto:apaul@nitkr.ac.in)

**Table of Contents:**

**1. Tables**

**2. Figures**

**3. References**

**Table S1.** Selected bond distances and bond angles marked in compound **1**.

| <b>Bond</b>                                                                     | <b>Length (Å)</b> | <b>Bond</b>       | <b>Angle (deg.)</b> |
|---------------------------------------------------------------------------------|-------------------|-------------------|---------------------|
| Ag(1)-N(1)                                                                      | 2.226(5)          | N(1)-Ag(1)-N(1)#1 | 135.8(3)            |
| Ag(1)-O(1)                                                                      | 2.613(4)          | N(1)-Ag(1)-O(1)   | 88.4(6)             |
| P(1)-O(1)                                                                       | 1.530(5)          | O(1)-Ag(1)-O(1)#1 | 78.4(3)             |
| P(1)-O(2)                                                                       | 1.556(5)          | O(1)-Ag(1)-N(1)#1 | 127.5(5)            |
| P(1)-O(3)                                                                       | 1.501(4)          | O(3)-P(1)-O(1)    | 114.4(3)            |
|                                                                                 |                   | O(3)-P(1)-O(2)    | 112.0(3)            |
|                                                                                 |                   | O(1)-P(1)-O(2)    | 108.2(3)            |
| Symmetry transformations used to generate equivalent atoms: #1; 0.5-x, y, 1.5-z |                   |                   |                     |

**Table S2.** Selected bond distances and bond angles marked in compound **2**.

| <b>Bond</b>                                                                                                            | <b>Length (Å)</b>   | <b>Bond</b>          | <b>Length (Å)</b>   |
|------------------------------------------------------------------------------------------------------------------------|---------------------|----------------------|---------------------|
| Ag(1)-N(2)                                                                                                             | 2.188(5)            | P(1)-O(5)            | 1.493(5)            |
| Ag(1)-O(7)#1                                                                                                           | 2.265(5)            | P(1)-O(6)            | 1.519(5)            |
| Ag(1)-O(4)                                                                                                             | 2.708(5)            | P(1)-O(7)            | 1.594(5)            |
| Ag(1)-O(6)                                                                                                             | 2.662(5)            | P(2)-O(1)            | 1.521(5)            |
| Ag(2)-N(1)                                                                                                             | 2.192(6)            | P(2)-O(2)            | 1.484(5)            |
| Ag(2)-O(1)                                                                                                             | 2.290(5)            | P(2)-O(3)            | 1.585(5)            |
| Ag(2)-O(7)#2                                                                                                           | 2.398(5)            | <b>Ag(1)-Ag(2)#1</b> | 3.1786(8)           |
| <b>Bond</b>                                                                                                            | <b>Angle (deg.)</b> | <b>Bond</b>          | <b>Angle (deg.)</b> |
| N(2)-Ag(1)-O(7)#1                                                                                                      | 167.4(2)            | O(1)-Ag(2)-O(7)#2    | 99.9(1)             |
| O(6)-Ag(1)-O(4)#1                                                                                                      | 158.3(1)            | Ag(1)-O(7)-Ag(2)#4   | 124.1(2)            |
| O(6)-Ag(1)-O(7)#2                                                                                                      | 86.2(1)             | O(5)-P(1)-O(7)       | 116.2(3)            |
| O(6)-Ag(1)-N(2)#2                                                                                                      | 96.3(1)             | O(5)-P(1)-O(6)       | 111.7(3)            |
| O(4)-Ag(1)-N(2)#2                                                                                                      | 99.5(1)             | O(7)-P(1)-O(6)       | 105.9(3)            |
| O(4)-Ag(1)-O(7)#2                                                                                                      | 75.1(1)             | O(2)-P(2)-O(1)       | 117.0(3)            |
| N(1)-Ag(2)-O(1)                                                                                                        | 138.6(2)            | O(2)-P(2)-O(3)       | 107.4(3)            |
| N(1)-Ag(2)-O(7)#2                                                                                                      | 120.3(1)            | O(1)-P(2)-O(3)       | 108.8(3)            |
| Symmetry transformations used to generate equivalent atoms: #1; 1+x, 1-y, 0.5+z; #2; x, 1-y, -0.5+z; #4; x, 1-y, 0.5+z |                     |                      |                     |

**Table S3.** Selected bond distances and bond angles marked in compound **3**.

| <b>Bond</b>                                                                                                                                                       | <b>Length (Å)</b>   | <b>Bond</b>          | <b>Length (Å)</b>   |
|-------------------------------------------------------------------------------------------------------------------------------------------------------------------|---------------------|----------------------|---------------------|
| Ag(1)-O(1)                                                                                                                                                        | 2.275(3)            | <b>Ag(2)-Ag(2)#4</b> | <b>3.1495(9)</b>    |
| Ag(1)-O(3)#1                                                                                                                                                      | 2.403(3)            | <b>Ag(2)-Ag(2)#5</b> | <b>3.1927(8)</b>    |
| Ag(1)-O(2)#2                                                                                                                                                      | 2.443(4)            | P(1)-O(1)            | 1.518(4)            |
| Ag(1)-O(6)#3                                                                                                                                                      | 2.505(4)            | P(1)-O(2)            | 1.523(4)            |
| Ag(1)-O(6)                                                                                                                                                        | 2.601(3)            | P(1)-O(3)            | 1.544(4)            |
| Ag(2)-O(1)                                                                                                                                                        | 2.309(4)            | P(2)-O(5)            | 1.552(4)            |
| Ag(2)-O(2)#4                                                                                                                                                      | 2.383(4)            | P(2)-O(6)            | 1.529(4)            |
| Ag(2)-O(2)#1                                                                                                                                                      | 2.461(4)            | P(2)-O(7)            | 1.511(4)            |
| Ag(2)-O(5)#4                                                                                                                                                      | 2.486(4)            |                      |                     |
| <b>Bond</b>                                                                                                                                                       | <b>Angle (deg.)</b> | <b>Bond</b>          | <b>Angle (deg.)</b> |
| O(1)-Ag(1)-O(3)#1                                                                                                                                                 | 104.72(13)          | O(2)#1-Ag(2)-O(5)#4  | 86.72(12)           |
| O(1)-Ag(1)-O(2)#2                                                                                                                                                 | 130.34(13)          | Ag(1)-O(1)-Ag(2)     | 108.94(14)          |
| O(3)#1-Ag(1)-O(2)                                                                                                                                                 | 97.67(12)           | Ag(2)#4-O(1)-Ag(1)#2 | 90.80(12)           |
| O(1)-Ag(1)-O(6)#3                                                                                                                                                 | 126.93(13)          | Ag(2)#4-O(1)-Ag(2)#6 | 82.44(11)           |
| O(3)#1-Ag(1)-O(6)#3                                                                                                                                               | 97.97(12)           | Ag(1)#2-O(1)-Ag(2)#6 | 117.00(14)          |
| O(2)#2-Ag(1)-O(6)#3                                                                                                                                               | 91.98(12)           | O(1)-P(1)-O(2)       | 112.6(2)            |
| O(1)-Ag(2)-O(2)#4                                                                                                                                                 | 164.73(13)          | O(1)-P(1)-O(3)       | 111.9(2)            |
| O(1)-Ag(2)-O(2)#1                                                                                                                                                 | 97.71(12)           | O(2)-P(1)-O(3)       | 110.3(2)            |
| O(2)#4-Ag(2)-O(2)#1                                                                                                                                               | 97.56(11)           | O(7)-P(2)-O(6)       | 112.7(2)            |
| O(1)-Ag(2)-O(5)#4                                                                                                                                                 | 101.89(14)          | O(7)-P(2)-O(5)       | 111.5(2)            |
| O(2)#4-Ag(2)-O(5)#4                                                                                                                                               | 78.61(12)           | O(6)-P(2)-O(5)       | 110.5(2)            |
| Symmetry transformations used to generate equivalent atoms: #1: -1+x, y, z; #2: 1-x, 2-y, 2-z; #3: x, 1+y, z; #4: 1-x, 1-y, 2-z; #5: -x, 1-y, 2-z; #6: 1+x, y, z. |                     |                      |                     |

**Table S4.** Selected bond distances and bond angles marked in compound 4.

| <b>Bond</b>          | <b>Length (Å)</b> | <b>Bond</b>          | <b>Length (Å)</b> |
|----------------------|-------------------|----------------------|-------------------|
| Ag(1)-O(1)           | 2.295(6)          | <b>Ag(1)-Ag(4)</b>   | <b>3.3041(9)</b>  |
| Ag(1)-O(2)#2         | 2.380(5)          | <b>Ag(2)-Ag(3)#4</b> | <b>3.1421(9)</b>  |
| Ag(1)-O(3)#1         | 2.349(5)          | <b>Ag(2)-Ag(5)</b>   | <b>3.1671(10)</b> |
| Ag(1)-O(12)#2        | 2.409(6)          | <b>Ag(2)-Ag(5)#4</b> | <b>3.1816(9)</b>  |
| Ag(2)-O(2)           | 2.370(6)          | <b>Ag(3)-Ag(2)#5</b> | <b>3.1421(9)</b>  |
| Ag(2)-O(4)           | 2.412(5)          | <b>Ag(3)-Ag(5)#5</b> | <b>3.0683(10)</b> |
| Ag(2)-O(5)#4         | 2.415(6)          | <b>Ag(4)-Ag(1)#4</b> | <b>3.0549(9)</b>  |
| Ag(2)-O(8)           | 2.384(5)          | <b>Ag(4)-Ag(1)#2</b> | <b>3.1922(9)</b>  |
| Ag(2)-O(12)          | 2.633(5)          | <b>Ag(5)-Ag(2)#3</b> | <b>3.1816(9)</b>  |
| Ag(3)-O(4)           | 2.287(6)          | <b>Ag(5)-Ag(3)#5</b> | <b>3.0683(10)</b> |
| Ag(3)-O(6)#4         | 2.405(5)          | P(1)-O(1)            | 1.519(6)          |
| Ag(3)-O(9)#5         | 2.450(6)          | P(1)-O(2)            | 1.535(5)          |
| Ag(4)-O(1)           | 2.328(6)          | P(1)-O(3)            | 1.531(5)          |
| Ag(4)-O(3)#2         | 2.348(5)          | P(2)-O(4)            | 1.514(6)          |
| Ag(4)-O(11)#2        | 2.405(6)          | P(2)-O(5)            | 1.503(6)          |
| Ag(4)-O(15)          | 2.396(6)          | P(2)-O(6)            | 1.559(5)          |
| Ag(5)-O(3)           | 2.594(6)          | P(3)-O(8)            | 1.548(5)          |
| Ag(5)-O(5)           | 2.444(6)          | P(3)-O(9)            | 1.515(6)          |
| Ag(5)-O(9)           | 2.502(6)          | P(3)-O(10)           | 1.503(6)          |
| Ag(5)-O(11)          | 2.360(6)          | P(4)-O(11)           | 1.510(6)          |
| Ag(5)-O(12)#3        | 2.467(6)          | P(4)-O(12)           | 1.507(6)          |
| <b>Ag(1)-Ag(1)#1</b> | <b>3.0051(12)</b> | P(4)-O(13)           | 1.589(5)          |
| <b>Ag(1)-Ag(4)#2</b> | <b>3.1922(9)</b>  | <b>Ag(1)-Ag(4)#3</b> | <b>3.0549(9)</b>  |

| <b>Bond</b>                                                                                                                                         | <b>Angle (deg.)</b> | <b>Bond</b>           | <b>Angle (deg.)</b> |
|-----------------------------------------------------------------------------------------------------------------------------------------------------|---------------------|-----------------------|---------------------|
| O(1)-Ag(1)-O(3)#1                                                                                                                                   | 144.48(18)          | O(12)#3-Ag(5)-O(3)    | 75.97(18)           |
| O(1)-Ag(1)-O(2)#2                                                                                                                                   | 117.86(19)          | O(9)-Ag(5)-O(3)       | 149.68(18)          |
| O(3)#1-Ag(1)-O(2)#2                                                                                                                                 | 97.63(18)           | Ag(1)-O(1)-Ag(4)      | 91.24(18)           |
| O(1)-Ag(1)-O(12)#2                                                                                                                                  | 97.6(2)             | Ag(2)-O(2)-Ag(1)#2    | 92.24(19)           |
| O(3)#1-Ag(1)-O(12)#2                                                                                                                                | 81.8(2)             | Ag(4)-O(3)-Ag(1)#1    | 81.15(16)           |
| O(2)#2-Ag(1)-O(12)#2                                                                                                                                | 91.8(2)             | Ag(4)-O(3)-Ag(5)      | 89.87(17)           |
| O(2)-Ag(2)-O(8)                                                                                                                                     | 161.95(18)          | Ag(1)#1-O(3)-Ag(5)    | 99.66(19)           |
| O(2)-Ag(2)-O(4)                                                                                                                                     | 83.66(19)           | Ag(3)-O(4)-Ag(2)      | 100.5(2)            |
| O(8)-Ag(2)-O(4)                                                                                                                                     | 114.19(19)          | Ag(2)#3-O(5)-Ag(5)    | 81.80(17)           |
| O(4)-Ag(3)-O(6)#4                                                                                                                                   | 115.63(19)          | Ag(3)#5-O(9)-Ag(5)    | 76.57(16)           |
| O(4)-Ag(3)-O(9)#5                                                                                                                                   | 122.09(19)          | Ag(5)-O(11)-Ag(4)#2   | 94.4(2)             |
| O(1)-Ag(4)-O(3)#2                                                                                                                                   | 120.63(19)          | Ag(1)#2-O(12)-Ag(5)#4 | 101.7(2)            |
| O(1)-Ag(4)-O(15)                                                                                                                                    | 106.9(2)            | O(1)-P(1)-O(3)        | 112.1(3)            |
| O(1)-Ag(4)-O(11)#2                                                                                                                                  | 107.4(2)            | O(1)-P(1)-O(2)        | 111.6(3)            |
| O(3)#2-Ag(4)-O(15)                                                                                                                                  | 129.71(19)          | O(3)-P(1)-O(2)        | 113.1(3)            |
| O(3)#2-Ag(4)-O(15)#2                                                                                                                                | 87.63(19)           | O(5)-P(2)-O(4)        | 113.1(3)            |
| O(15)-Ag(4)-O(11)#2                                                                                                                                 | 93.4(2)             | O(5)-P(2)-O(6)        | 110.0(3)            |
| O(11)-Ag(5)-O(5)                                                                                                                                    | 153.9(2)            | O(4)-P(2)-O(6)        | 110.8(3)            |
| O(11)-Ag(5)-O(12)#3                                                                                                                                 | 89.2(2)             | O(10)-P(3)-O(9)       | 112.3(3)            |
| O(5)-Ag(5)-O(12)#3                                                                                                                                  | 99.8(2)             | O(10)-P(3)-O(8)       | 111.7(3)            |
| O(11)-Ag(5)-O(9)                                                                                                                                    | 81.91(19)           | O(9)-P(3)-O(8)        | 111.4(3)            |
| O(5)-Ag(5)-O(9)                                                                                                                                     | 109.53(19)          | O(12)-P(4)-O(11)      | 118.1(4)            |
| O(12)#3-Ag(5)-O(9)                                                                                                                                  | 129.83(19)          | O(12)-P(4)-O(13)      | 107.3(3)            |
| O(11)-Ag(5)-O(3)                                                                                                                                    | 83.10(19)           | O(11)-P(4)-O(13)      | 108.6(3)            |
| O(5)-Ag(5)-O(3)                                                                                                                                     | 75.55(17)           |                       |                     |
| Symmetry transformations used to generate equivalent atoms: #1: 2-x, 1-y, 2-z; #2: 1-x, 1-y, 2-z; #3: 1+x, y, z; #4: -1+x, y, z; #5: 1-x, 1-y, 1-z. |                     |                       |                     |



**Table S5:** Selected hydrogen-bond distances (Å) and angles (°) for compound 1.

| Sl. No.                         | Donor --- H....Acceptor     | D – H (A°) | H... A (A°) | D... A (A°) | D -- H.... A (°) |
|---------------------------------|-----------------------------|------------|-------------|-------------|------------------|
| 1                               | O2---H2A...O3 <sup>#1</sup> | 0.89(9)    | 1.68(9)     | 2.563(7)    | 168(10)          |
| 3                               | C1---H1...O2                | 0.93       | 2.60        | 3.376(9)    | 142              |
| 4                               | C2---H2...O3 <sup>#2</sup>  | 0.93       | 2.55        | 3.456(9)    | 165              |
| #1: -x,1-y,1-z; #2: 1-x,1-y,1-z |                             |            |             |             |                  |

**Table S6:** Selected hydrogen-bond distances (Å) and angles (°) for compound 2.

| Sl. No.                                                                             | Donor --- H....Acceptor        | D – H (A°) | H... A (A°) | D... A (A°) | D -- H.... A (°) |
|-------------------------------------------------------------------------------------|--------------------------------|------------|-------------|-------------|------------------|
| 1                                                                                   | O4---H4...O3                   | 0.82       | 2.59        | 2.991(8)    | 123              |
| 2                                                                                   | O4---H4...O101                 | 0.82       | 2.13        | 2.714(9)    | 128              |
| 3                                                                                   | O101---H10A...O5 <sup>#3</sup> | 0.85(13)   | 2.03(14)    | 2.813(9)    | 152(16)          |
| 4                                                                                   | O101---H10B...O2 <sup>#4</sup> | 0.85(5)    | 1.90(7)     | 2.726(9)    | 166(8)           |
| 5                                                                                   | O100---H10C...O2 <sup>#3</sup> | 0.85(7)    | 2.01(10)    | 2.700(9)    | 138(10)          |
| 6                                                                                   | O100---H10E...O101             | 0.85(9)    | 2.60(9)     | 3.148(10)   | 124(7)           |
| 7                                                                                   | O100---H10E...O5 <sup>#3</sup> | 0.85(9)    | 2.01(9)     | 2.830(9)    | 163(8)           |
| 8                                                                                   | C5---H5...O5 <sup>#1</sup>     | 0.93       | 2.39        | 3.266(9)    | 158              |
| 9                                                                                   | C8---H8...O100 <sup>#2</sup>   | 0.93       | 2.53        | 3.410(10)   | 159              |
| 10                                                                                  | C9---H9...O4                   | 0.93       | 2.53        | 3.169(9)    | 126              |
| #1: -1+x,-y,-1/2+z; #2: x,-y,1/2+z; #3: -1/2+x,1/2-y,-1/2+z; #4: -1/2+x,1/2-y,1/2+z |                                |            |             |             |                  |



**Table S7:** Selected hydrogen-bond distances (Å) and angles (°) for compound **3**.

| Sl. No. | Donor --- H....Acceptor     | D – H (Å) | H... A (Å) | D... A (Å) | D -- H.... A (°) |
|---------|-----------------------------|-----------|------------|------------|------------------|
| 1       | N1---H1A...O7               | 0.90      | 2.73       | 3.308(6)   | 122              |
| 2       | N1---H1B...O4 <sup>#2</sup> | 0.90      | 2.56       | 3.204(7)   | 129              |
| 3       | O4---H4...O6 <sup>#1</sup>  | 0.82      | 2.16       | 2.907(5)   | 151              |
| 4       | C3---H3B...O4 <sup>#1</sup> | 0.97      | 2.55       | 3.436(7)   | 152              |
| 5       | C4---H4A...O7 <sup>#2</sup> | 0.97      | 1.72       | 2.688(6)   | 172              |
| 6       | C4---H4B...O6 <sup>#3</sup> | 0.97      | 1.92       | 2.884(5)   | 176              |
| 7       | C4---H4B...O7 <sup>#3</sup> | 0.97      | 2.56       | 3.105(6)   | 116              |

#1: -1+x,y,z; #2: -x,1-y,1-z; #3: 1-x,1-y,1-z

**Table S8:** Selected hydrogen-bond distances (Å) and angles (°) for compound **4**.

| Sl. No. | Donor --- H....Acceptor       | D – H (Å) | H... A (Å) | D... A (Å) | D -- H.... A (°) |
|---------|-------------------------------|-----------|------------|------------|------------------|
| 1       | N1---H1A...O10 <sup>#5</sup>  | 0.90      | 2.57       | 3.293(11)  | 138              |
| 2       | N1---H1B...O7                 | 0.90      | 2.67       | 3.30(8)    | 120              |
| 3       | O7---H7...O2 <sup>#1</sup>    | 0.82      | 2.30       | 2.910(8)   | 131              |
| 4       | O14---H14...O10               | 0.82      | 2.59       | 3.026(8)   | 115              |
| 5       | O15---H15...O13 <sup>#4</sup> | 0.82      | 2.12       | 2.878(8)   | 153              |
| 6       | O15---H16...O7 <sup>#4</sup>  | 0.86(6)   | 1.93(6)    | 2.783(8)   | 175              |
| 7       | C5---H5A...O10 <sup>#3</sup>  | 0.97      | 1.67       | 2.616(9)   | 164              |
| 8       | C5---H5B...O9 <sup>#2</sup>   | 0.97      | 1.93       | 2.852(9)   | 157              |
| 9       | C5---H5B...O10 <sup>#2</sup>  | 0.97      | 2.55       | 3.320(9)   | 136              |
| 10      | C6---H6A...O10 <sup>#2</sup>  | 0.97      | 2.38       | 3.198(10)  | 142              |

#1: -1+x,y,z; #2: -1+x,y,1+z; #3: x,y,1+z; #4: 1+x,y,z; #5: 1-x,-y,-z

**Table S9:** Optimized conditions for the cyanosilylation reaction of aromatic aldehyde with compounds **1** – **4** as catalyst.

| 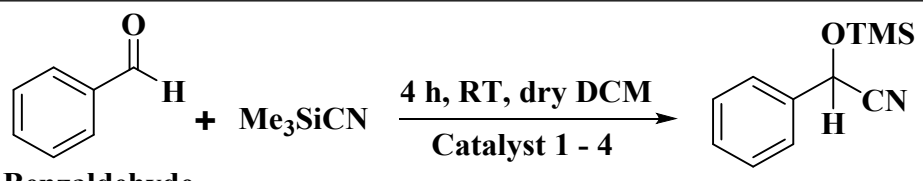 |                  |          |                    |             |
|------------------------------------------------------------------------------------|------------------|----------|--------------------|-------------|
| Catalyst                                                                           | Temperature (°C) | Time (h) | Isolated yield (%) | TON         |
| <b>1</b>                                                                           | <b>RT</b>        | <b>4</b> | <b>90</b>          | <b>4.50</b> |
| <b>2</b>                                                                           |                  |          | <b>99</b>          | <b>4.95</b> |
| <b>3</b>                                                                           |                  |          | <b>84</b>          | <b>4.20</b> |
| <b>4</b>                                                                           |                  |          | <b>96</b>          | <b>4.80</b> |
| 1                                                                                  | RT               | 2        | 64                 | 3.20        |
| 2                                                                                  |                  |          | 75                 | 3.75        |
| 3                                                                                  |                  |          | 58                 | 2.90        |
| 4                                                                                  |                  |          | 69                 | 3.45        |
| 1                                                                                  | RT               | 6        | 91                 | 4.55        |
| 2                                                                                  |                  |          | 99                 | 4.95        |
| 3                                                                                  |                  |          | 85                 | 4.25        |
| 4                                                                                  |                  |          | 95                 | 4.75        |
| 1                                                                                  | 0-5              | 4        | 78                 | 3.90        |
| 2                                                                                  |                  |          | 86                 | 4.30        |
| 3                                                                                  |                  |          | 71                 | 3.55        |
| 4                                                                                  |                  |          | 82                 | 4.10        |
| AgNO <sub>3</sub>                                                                  | RT               | 4        | 35                 | 1.75        |
| 4,4'-bipyridine                                                                    | RT               | 4        | 25                 | 1.25        |
| Piperazine                                                                         | RT               | 4        | 11                 | 0.55        |
| HEDP                                                                               | RT               | 4        | <10                | <0.50       |
| No catalyst                                                                        | RT               | 4        | <5                 | <0.25       |

Reaction conditions: Benzaldehyde (0.5 mmol), Me<sub>3</sub>SiCN (0.75 mmol), catalyst (0.1 mmol), and dry DCM (10 mL), room temperature, 4h. TON = %conversion (mmol of substrate/mmol of catalyst).

**Table S10:** Optimized conditions for the cyanosilylation reaction of imines with compounds **1 – 4** as catalyst.

| 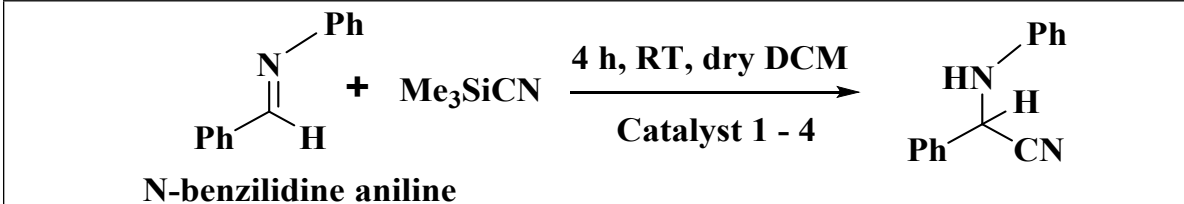 <p style="text-align: center;"><b>N-benzylideneaniline</b></p> |                  |          |                    |       |
|---------------------------------------------------------------------------------------------------------------------------------------------------|------------------|----------|--------------------|-------|
| Catalyst                                                                                                                                          | Temperature (°C) | Time (h) | Isolated yield (%) | TON   |
| 1                                                                                                                                                 | RT               | 4        | 88                 | 4.40  |
| 2                                                                                                                                                 |                  |          | 98                 | 4.90  |
| 3                                                                                                                                                 |                  |          | 82                 | 4.10  |
| 4                                                                                                                                                 |                  |          | 93                 | 4.65  |
| 1                                                                                                                                                 | RT               | 2        | 69                 | 3.45  |
| 2                                                                                                                                                 |                  |          | 72                 | 3.60  |
| 3                                                                                                                                                 |                  |          | 62                 | 3.10  |
| 4                                                                                                                                                 |                  |          | 67                 | 3.35  |
| 1                                                                                                                                                 | RT               | 6        | 93                 | 4.65  |
| 2                                                                                                                                                 |                  |          | 98                 | 4.90  |
| 3                                                                                                                                                 |                  |          | 90                 | 4.50  |
| 4                                                                                                                                                 |                  |          | 93                 | 4.65  |
| 1                                                                                                                                                 | 0-5              | 4        | 80                 | 4.00  |
| 2                                                                                                                                                 |                  |          | 83                 | 4.15  |
| 3                                                                                                                                                 |                  |          | 75                 | 3.75  |
| 4                                                                                                                                                 |                  |          | 79                 | 3.95  |
| AgNO <sub>3</sub>                                                                                                                                 | RT               | 4        | 30                 | 1.50  |
| 4,4'-bipyridine                                                                                                                                   | RT               | 4        | 22                 | 1.10  |
| Piperazine                                                                                                                                        | RT               | 4        | 12                 | 0.60  |
| HEDP                                                                                                                                              | RT               | 4        | <8                 | <0.40 |
| No catalyst                                                                                                                                       | RT               | 4        | <5                 | <0.25 |

Reaction conditions: N-benzylideneaniline (0.5 mmol), Me<sub>3</sub>SiCN (0.75 mmol), catalyst (0.1 mmol), and dry DCM (10 mL), room temperature, 4h. TON = %conversion (mmol of substrate/mmol of catalyst).

**Table S11:** Optimized condition for the cyclic ketal formation reactions employing for the catalysts 1 – 4.

| 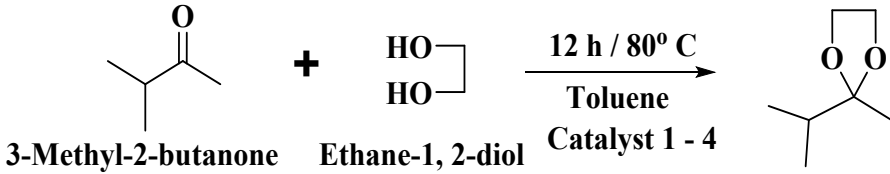 |                  |          |                    |       |
|------------------------------------------------------------------------------------|------------------|----------|--------------------|-------|
| Catalyst                                                                           | Temperature (°C) | Time (h) | Isolated yield (%) | TON   |
| 1                                                                                  | 80               | 12       | 91                 | 291.2 |
| 2                                                                                  |                  |          | 96                 | 307.2 |
| 3                                                                                  |                  |          | 80                 | 256.0 |
| 4                                                                                  |                  |          | 88                 | 281.6 |
| 1                                                                                  | 100              | 12       | 89                 | 284.8 |
| 2                                                                                  |                  |          | 94                 | 300.8 |
| 3                                                                                  |                  |          | 77                 | 246.4 |
| 4                                                                                  |                  |          | 86                 | 275.2 |
| 1                                                                                  | 60               | 12       | 82                 | 262.4 |
| 2                                                                                  |                  |          | 88                 | 281.6 |
| 3                                                                                  |                  |          | 70                 | 224.0 |
| 4                                                                                  |                  |          | 75                 | 240.0 |
| 1                                                                                  | 80               | 15       | 90                 | 288.0 |
| 2                                                                                  |                  |          | 97                 | 310.4 |
| 3                                                                                  |                  |          | 82                 | 262.4 |
| 4                                                                                  |                  |          | 89                 | 284.8 |
| 1                                                                                  | 80               | 9        | 78                 | 249.6 |
| 2                                                                                  |                  |          | 84                 | 268.8 |
| 3                                                                                  |                  |          | 64                 | 204.8 |
| 4                                                                                  |                  |          | 70                 | 224.0 |
| AgNO <sub>3</sub>                                                                  | 80               | 12       | 32                 | 102.4 |
| 4,4'-bipyridine                                                                    | 80               | 12       | 18                 | 57.6  |
| Piperazine                                                                         | 80               | 12       | 15                 | 48.0  |
| HEDP                                                                               | 80               | 12       | <12                | <38.4 |
| No catalyst                                                                        | 80               | 12       | <5                 | <16.0 |

Reaction conditions: 3-Methyl-2-butanone (16 mmol), ethanol (16 mmol), catalyst (0.05 mmol) and toluene (10 mL), 80 °C, 12h. TON = %conversion (mmol of substrate/mmol of catalyst).

**Table S12:** Optimized condition for the ester formation reactions employing for the catalysts **1 – 4**.

| 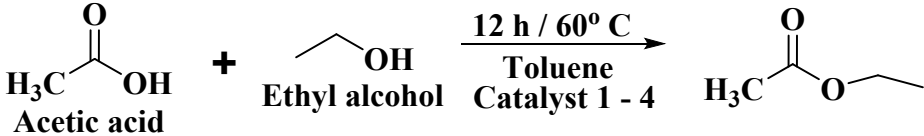 |                  |           |                    |              |
|------------------------------------------------------------------------------------|------------------|-----------|--------------------|--------------|
| Catalyst                                                                           | Temperature (°C) | Time (h)  | Isolated yield (%) | TON          |
| <b>1</b>                                                                           | <b>60</b>        | <b>12</b> | <b>61</b>          | <b>195.2</b> |
| <b>2</b>                                                                           |                  |           | <b>69</b>          | <b>220.8</b> |
| <b>3</b>                                                                           |                  |           | <b>50</b>          | <b>160.0</b> |
| <b>4</b>                                                                           |                  |           | <b>55</b>          | <b>176.0</b> |
| 1                                                                                  | 80               | 12        | 55                 | 176.0        |
| 2                                                                                  |                  |           | 62                 | 198.4        |
| 3                                                                                  |                  |           | 47                 | 150.4        |
| 4                                                                                  |                  |           | 50                 | 160.0        |
| 1                                                                                  | 40               | 12        | 49                 | 156.8        |
| 2                                                                                  |                  |           | 55                 | 176.0        |
| 3                                                                                  |                  |           | 45                 | 144.0        |
| 4                                                                                  |                  |           | 48                 | 153.6        |
| 1                                                                                  | 60               | 15        | 62                 | 198.4        |
| 2                                                                                  |                  |           | 68                 | 217.6        |
| 3                                                                                  |                  |           | 50                 | 160.0        |
| 4                                                                                  |                  |           | 56                 | 179.2        |
| 1                                                                                  | 60               | 9         | 54                 | 172.8        |
| 2                                                                                  |                  |           | 62                 | 198.4        |
| 3                                                                                  |                  |           | 42                 | 134.4        |
| 4                                                                                  |                  |           | 48                 | 153.6        |
| AgNO <sub>3</sub>                                                                  | 60               | 12        | 15                 | 48.0         |
| 4,4'-bipyridine                                                                    | 60               | 12        | <10                | <32.0        |
| Piperazine                                                                         | 60               | 12        | <5                 | <16.0        |
| HEDP                                                                               | 60               | 12        | <10                | <32.0        |
| No catalyst                                                                        | 60               | 12        | <5                 | <16.0        |

Reaction conditions: Acetic acid (16 mmol), ethanol (16 mmol), catalyst (0.05 mmol) and toluene (10 mL), 60 °C, 12h. TON = %conversion (mmol of substrate/mmol of catalyst).

**Table S13.** Comparison table of crystallographic parameters between various reported silver phosphonate frameworks and our present compounds.

| Chemical Formula and Formula Weight (F.W.)                                                                          | Crystal System | Space Group             | a (Å), b (Å), c (Å)                       | V (Å <sup>3</sup> ) | Z | D (g cm <sup>-3</sup> ) | $\mu$ (min <sup>-1</sup> ) | GO F on F <sup>2</sup> | Ref. No.     |
|---------------------------------------------------------------------------------------------------------------------|----------------|-------------------------|-------------------------------------------|---------------------|---|-------------------------|----------------------------|------------------------|--------------|
| Ag <sub>4</sub> O <sub>6</sub> P <sub>2</sub> C <sub>2</sub> H <sub>4</sub><br>F.W. = 617.47                        | Monoclinic     | <i>P2<sub>1</sub>/n</i> | 6.0115(16),<br>8.630(2),<br>8.462(2)      | 435.1(2)            | 2 | 4.713                   | 9.231                      | 1.196                  | [S1]         |
| AgUO <sub>2</sub> [CH <sub>2</sub> (PO <sub>3</sub> )(PO <sub>3</sub> H)]<br>F.W. = 549.87                          | Orthorhombic   | <i>Pbca</i>             | 12.0098(7),<br>10.3144(6),<br>12.2260(7)  | 1514.48(15)         | 8 | 4.823                   | 24.379                     | 1.272                  | [S2]         |
| Ag <sub>2</sub> UO <sub>2</sub> [CH <sub>2</sub> (PO <sub>3</sub> ) <sub>2</sub> ]<br>F.W. = 657.74                 | Monoclinic     | <i>P2<sub>1</sub>/n</i> | 7.9919(4),<br>12.5811(6),<br>8.1506(4)    | 814.63(7)           | 4 | 2.99                    | 24.999                     | 1.059                  | [S2]         |
| C <sub>14</sub> H <sub>18</sub> Ag <sub>2</sub> N <sub>2</sub> O <sub>6</sub> P <sub>2</sub><br>F.W = 587.98        | Monoclinic     | <i>P2/c</i>             | 11.7570(14),<br>4.6361(5),<br>16.3047(18) | 866.75(17)          | 2 | 2.253                   | 2.480                      | 1.064                  | [S3]         |
| C <sub>35</sub> H <sub>40</sub> Ag <sub>2</sub> N <sub>4</sub> O <sub>10</sub> P <sub>3</sub><br>F.W. = 985.36      | Triclinic      | <i>P-1</i>              | 10.4999(7),<br>12.1860(8),<br>15.1329(9)  | 1827.5(2)           | 2 | 1.791                   | 1.267                      | 1.031                  | [S3]         |
| C <sub>12</sub> H <sub>14</sub> Ag <sub>4</sub> O <sub>8</sub> P <sub>2</sub><br>F.W. = 779.48                      | Monoclinic     | <i>P2<sub>1</sub>/c</i> | 8.246(1),<br>28.040(4),<br>8.126(1)       | 1859.3(4)           | 4 | 2.771                   | 4.360                      | 1.152                  | [S4]         |
| C <sub>14</sub> H <sub>13</sub> Ag <sub>2</sub> NO <sub>5</sub> P <sub>2</sub><br>F.W. = 552.78                     | Triclinic      | <i>P-1</i>              | 6.0537(9),<br>11.2351(2),<br>12.7177(1)   | 851.9(2)            | 2 | 2.156                   | 2.510                      | 1.017                  | [S4]         |
| C <sub>30</sub> H <sub>21</sub> Ag <sub>11</sub> F <sub>6</sub> O <sub>16</sub> P <sub>4</sub><br>F.W. = 2061.92    | Monoclinic     | <i>C2/c</i>             | 32.021(3),<br>13.148(1),<br>10.017(9)     | 4203.2(7)           | 4 | 3.258                   | 5.252                      | 1.101                  | [S5]         |
| Ag <sub>4</sub> P <sub>2</sub> O <sub>6</sub> C <sub>12</sub> H <sub>10</sub><br>F.W. = 743.62                      | Monoclinic     | <i>P2<sub>1</sub>/c</i> | 5.6657(3),<br>10.1483(5),<br>29.733(2)    | 1709.51(2)          | 4 | 2.89                    | –                          | 0.927                  | [S6]         |
| AgC <sub>6</sub> H <sub>7</sub> P <sub>2</sub> O <sub>6</sub><br>F.W. = 343.9                                       | Triclinic      | <i>P-1</i>              | 5.7484(2),<br>7.7389(3),<br>20.8271(8)    | 919.77(2)           | 4 | 2.49                    | –                          | 1.015                  | [S7]         |
| C <sub>150</sub> H <sub>282</sub> Ag <sub>45</sub> O <sub>34</sub> P <sub>9</sub> S <sub>29</sub><br>F.W. = 8692.57 | Hexagonal      | <i>P-62c</i>            | 20.6340(12),<br>20.6340(12),<br>36.384(4) | 13416(2)            | 2 | –                       | 3.520                      | 1.502                  | [S8]         |
| Ag <sub>2</sub> P <sub>2</sub> O <sub>8</sub> N <sub>2</sub> C <sub>11</sub> H <sub>10</sub><br>F.W. = 468.02       | Monoclinic     | <i>P2/n</i>             | 5.4579(5),<br>10.4871(9),<br>13.0653(12)  | 747.31(12)          | 2 | 2.080                   | 1.609                      | 1.348                  | Present work |
| Ag <sub>2</sub> P <sub>2</sub> O <sub>9</sub> N <sub>2</sub> C <sub>12</sub> H <sub>16</sub><br>F.W. = 609.95       | Monoclinic     | <i>Cc</i>               | 13.7091(4),<br>18.1676(5),<br>7.1474(2)   | 1776.12(9)          | 4 | 2.281                   | 2.437                      | 1.177                  | Present work |
| Ag <sub>2</sub> P <sub>2</sub> O <sub>7</sub> NC <sub>4</sub> H <sub>10</sub><br>F.W. = 461.81                      | Triclinic      | <i>P-1</i>              | 5.6217(2),<br>6.9511(2),<br>13.1285(4)    | 498.72(3)           | 2 | 3.069                   | 4.267                      | 1.286                  | Present work |

|                                                                                                |           |             |                                         |                 |   |           |       |           |                     |
|------------------------------------------------------------------------------------------------|-----------|-------------|-----------------------------------------|-----------------|---|-----------|-------|-----------|---------------------|
| <b>Ag<sub>5</sub>P<sub>4</sub>O<sub>16</sub>NC<sub>6</sub>H<sub>16</sub></b><br>F.W. = 1021.43 | Triclinic | <i>P</i> -1 | 5.7341(3),<br>13.4208(8),<br>13.6754(8) | 1019.08(1<br>0) | 2 | 3.32<br>9 | 5.114 | 1.21<br>0 | <b>Present work</b> |
|------------------------------------------------------------------------------------------------|-----------|-------------|-----------------------------------------|-----------------|---|-----------|-------|-----------|---------------------|

**Table S14.** Comparison table of average Ag–O and Ag–Ag bond distance (Å) values between reported silver phosphonate frameworks and our present compounds.

| <b>Chemical Formula</b>                                                                           | <b>Average Ag–O bond distance (Å)</b> | <b>Average Ag–Ag bond distance (Å)</b> | <b>Reference No.</b> |
|---------------------------------------------------------------------------------------------------|---------------------------------------|----------------------------------------|----------------------|
| Ag <sub>4</sub> O <sub>6</sub> P <sub>2</sub> C <sub>2</sub> H <sub>4</sub>                       | 2.291                                 | 3.143                                  | [S1]                 |
| AgUO <sub>2</sub> [CH <sub>2</sub> (PO <sub>3</sub> )(PO <sub>3</sub> H)]                         | 2.507                                 | –                                      | [S2]                 |
| Ag <sub>2</sub> UO <sub>2</sub> [CH <sub>2</sub> (PO <sub>3</sub> ) <sub>2</sub> ]                | 2.386                                 | 3.246                                  | [S2]                 |
| C <sub>14</sub> H <sub>18</sub> Ag <sub>2</sub> N <sub>2</sub> O <sub>6</sub> P <sub>2</sub>      | 2.183                                 | 3.226                                  | [S3]                 |
| C <sub>35</sub> H <sub>40</sub> Ag <sub>2</sub> N <sub>4</sub> O <sub>10</sub> P <sub>3</sub>     | 2.662                                 | 3.181                                  | [S3]                 |
| C <sub>12</sub> H <sub>14</sub> Ag <sub>4</sub> O <sub>8</sub> P <sub>2</sub>                     | 2.372                                 | 3.151                                  | [S4]                 |
| C <sub>14</sub> H <sub>13</sub> Ag <sub>2</sub> NO <sub>5</sub> P <sub>2</sub>                    | 2.381                                 | 3.056                                  | [S4]                 |
| C <sub>30</sub> H <sub>21</sub> Ag <sub>11</sub> F <sub>6</sub> O <sub>16</sub> P <sub>4</sub>    | –                                     | 3.075                                  | [S5]                 |
| Ag <sub>4</sub> P <sub>2</sub> O <sub>6</sub> C <sub>12</sub> H <sub>10</sub>                     | 2.401                                 | 3.174                                  | [S6]                 |
| AgC <sub>6</sub> H <sub>7</sub> P <sub>2</sub> O <sub>6</sub>                                     | 2.346                                 | –                                      | [S7]                 |
| C <sub>150</sub> H <sub>282</sub> Ag <sub>45</sub> O <sub>34</sub> P <sub>9</sub> S <sub>29</sub> | 2.355                                 | 3.142                                  | [S8]                 |
| AgP <sub>2</sub> O <sub>8</sub> N <sub>2</sub> C <sub>11</sub> H <sub>10</sub>                    | <b>2.613</b>                          | –                                      | <b>Present work</b>  |
| Ag <sub>2</sub> P <sub>2</sub> O <sub>9</sub> N <sub>2</sub> C <sub>12</sub> H <sub>16</sub>      | <b>2.464</b>                          | <b>3.178</b>                           | <b>Present work</b>  |
| Ag <sub>2</sub> P <sub>2</sub> O <sub>7</sub> NC <sub>4</sub> H <sub>10</sub>                     | <b>2.429</b>                          | <b>3.170</b>                           | <b>Present work</b>  |
| Ag <sub>5</sub> P <sub>4</sub> O <sub>16</sub> NC <sub>6</sub> H <sub>16</sub>                    | <b>2.422</b>                          | <b>3.154</b>                           | <b>Present work</b>  |

**Table S15.** Comparison table of room temperature dielectric permittivity values between different reported MOFs and our present compounds.

| Entry | Different Metal-organic frameworks                                                                                                                                                                                                                   | Dielectric permittivity ( $\epsilon'$ ) at room temperature for $\nu = 10^3$ Hz | Reference           |
|-------|------------------------------------------------------------------------------------------------------------------------------------------------------------------------------------------------------------------------------------------------------|---------------------------------------------------------------------------------|---------------------|
| 1     | [(H <sub>3</sub> betc)(H-Hopip) <sub>0.5</sub> (H <sub>2</sub> O)] (OCC 1)<br>[(H <sub>3</sub> betc) <sub>2</sub> (H <sub>2</sub> -Mepip)(H <sub>2</sub> O)] (OCC 2)                                                                                 | ~135<br>~500                                                                    | [S9]                |
| 2     | [Cu <sub>2</sub> (EBTC)(H <sub>2</sub> O) <sub>2</sub> ·8H <sub>2</sub> O·DMF·DMSO] <sub>n</sub> (EBTC = 1,10-ethynebenzene3,3',5,5'-tetracarboxylate)                                                                                               | ~35                                                                             | [S10]               |
| 3     | [C <sub>6</sub> Apy][PbI <sub>3</sub> ] (C <sub>6</sub> -Apy <sup>+</sup> = 1-hexyl-4-aminopyridinium)                                                                                                                                               | ~1000                                                                           | [S11]               |
| 4     | 4-(4-(4nitrobenzylideneamino) benzyl) oxazolidin-2-one (NBOA)<br>4-(4-(4chlorobenzylideneamino) benzyl) oxazolidin-2-one (CBOA)<br>4-(4-(4-hydroxybenzylideneamino)benzyl) oxazolidin-2-one (HBOA)                                                   | ~150<br>~400<br>~800                                                            | [S12]               |
| 5     | [Ag <sub>2</sub> (CA)] <sub>n</sub>                                                                                                                                                                                                                  | ~34                                                                             | [S13]               |
| 6     | [Zn <sub>3</sub> btc <sub>2</sub> {Cr <sub>3</sub> O(isonic) <sub>6</sub> (H <sub>2</sub> O) <sub>2</sub> (OH)}] ·(DMF) <sub>15.5</sub> (H <sub>2</sub> O) <sub>8</sub> (H <sub>3</sub> btc=1,3,5-benzenetricarboxylic acid; isonic = isonicotinate) | ~155                                                                            | [S14]               |
| 7     | FeF <sub>3</sub> (2,2'-bpy)                                                                                                                                                                                                                          | ~100                                                                            | [S15]               |
| 8     | Q[8](CuCl <sub>2</sub> ) <sub>0.75</sub> ·30(H <sub>2</sub> O) (Q[8] = cucurbit[8]-uril)                                                                                                                                                             | ~2000                                                                           | [S16]               |
| 9     | Cd(hpip)Br <sub>2</sub> ] <sub>n</sub> [hpip = homopiperazine]                                                                                                                                                                                       | ~300                                                                            | [S17]               |
| 10    | <b>Compound 1</b><br><b>Compound 2</b><br><b>Compound 3</b><br><b>Compound 4</b>                                                                                                                                                                     | <b>157</b><br><b>191</b><br><b>3408</b><br><b>5990</b>                          | <b>Present Work</b> |



**Table S16.** Comparison of the catalytic activity with reported aromatic aldehyde and imines cyanosilylation reactions catalyzed by various catalysts.

| Entry | Catalyst used for aromatic aldehyde cyanosilylation reactions                                                                                                                                                                                                                                                                                               | Temperature (°C) and Time                    | Yield (%)                                        | Ref.                |
|-------|-------------------------------------------------------------------------------------------------------------------------------------------------------------------------------------------------------------------------------------------------------------------------------------------------------------------------------------------------------------|----------------------------------------------|--------------------------------------------------|---------------------|
| 1     | [Ag <sub>4</sub> (apym) <sub>4</sub> (SiW <sub>12</sub> O <sub>40</sub> ) <sub>n</sub> , where apym = 2-aminopyrimidine                                                                                                                                                                                                                                     | RT, 4 h.                                     | 96.2                                             | [S18]               |
| 2     | Eu-POM<br>Tb-POM<br>Yb-POM                                                                                                                                                                                                                                                                                                                                  | RT, 6 h.<br>RT, 6 h.<br>RT, 6 h.             | 76<br>70<br>71                                   | [S19]               |
| 3     | Al/Fe-ITQ-NO2 98<br>Al-ITQ-Br                                                                                                                                                                                                                                                                                                                               | RT, 5 h.<br>RT, 5 h.                         | 98<br>88                                         | [S20]               |
| 4     | BINAPDA-Zr-MOF                                                                                                                                                                                                                                                                                                                                              | RT, 5 h.                                     | 95                                               | [S21]               |
| 5     | La-BTTc                                                                                                                                                                                                                                                                                                                                                     | RT, 2 h.                                     | 82                                               | [S22]               |
| 6     | [Cd(PBA)(DMF)]·DMF.                                                                                                                                                                                                                                                                                                                                         | RT, 8 h.                                     | 89                                               | [S23]               |
| 7     | [Eu <sub>2</sub> (PDC) <sub>3</sub> ·2H <sub>2</sub> O]·4H <sub>2</sub> O                                                                                                                                                                                                                                                                                   | RT, 3 h.                                     | 93                                               | [S24]               |
| 8     | <b>Catalyst 1</b><br><b>Catalyst 2</b><br><b>Catalyst 3</b><br><b>Catalyst 4</b>                                                                                                                                                                                                                                                                            | RT, 4 h.<br>RT, 4 h.<br>RT, 4 h.<br>RT, 4 h. | <b>90</b><br><b>99</b><br><b>84</b><br><b>96</b> | <b>Present Work</b> |
| Entry | Catalyst used for imines cyanosilylation reactions                                                                                                                                                                                                                                                                                                          | Temperature (°C) and Time                    | Yield (%)                                        | Ref.                |
| 1     | {[In <sub>3</sub> (NIPH) <sub>3</sub> (HNIPH)(OH) <sub>2</sub> ]·4H <sub>2</sub> O} <sub>n</sub>                                                                                                                                                                                                                                                            | RT, 24 h.                                    | 96                                               | [S25]               |
| 2     | {[Cu <sub>3</sub> (hbpdc)(OH) <sub>2</sub> (H <sub>2</sub> O)]·2H <sub>2</sub> O} <sub>n</sub><br>{[Cu <sub>2</sub> (hbpdc)(H <sub>2</sub> O)] <sub>n</sub>                                                                                                                                                                                                 | RT, 4 h.<br>RT, 4 h.                         | 95<br>93                                         | [S26]               |
| 3     | {[Cd(4,4'-bpy) <sub>2</sub> (H <sub>2</sub> O) <sub>2</sub> ](NO <sub>3</sub> ) <sub>2</sub> ·4H <sub>2</sub> O} <sub>n</sub>                                                                                                                                                                                                                               | 0°C, 1 h.                                    | 97                                               | [S27]               |
| 4     | [Cd <sub>2</sub> (H <sub>2</sub> O)(C <sub>2</sub> H <sub>2</sub> N <sub>3</sub> )(SO <sub>4</sub> )]<br>[Cd <sub>5</sub> (OH) <sub>2</sub> (CH <sub>2</sub> N <sub>5</sub> ) <sub>4</sub> (SO <sub>4</sub> ) <sub>2</sub> ]<br>[Cd <sub>2</sub> (OH)(H <sub>2</sub> O)(C <sub>2</sub> H <sub>3</sub> N <sub>4</sub> )(SO <sub>4</sub> )]·2H <sub>2</sub> O | 0°C, 2 h.<br>0°C, 2 h.<br>0°C, 2 h.          | 98<br>98<br>98                                   | [S28]               |
| 5     | [Ag <sub>8</sub> (SO <sub>4</sub> ) <sub>4</sub> (C <sub>3</sub> H <sub>6</sub> N <sub>6</sub> ) <sub>3</sub> ]                                                                                                                                                                                                                                             | 0°C, 2 h.                                    | 99                                               | [S29]               |
| 6     | [Cd(L)(H <sub>2</sub> O)]·H <sub>2</sub> O, CP - <b>I</b><br>[Cd(L)], CP - <b>II</b>                                                                                                                                                                                                                                                                        | RT, 4 h.<br>RT, 4 h.                         | 81<br>70                                         | [S30]               |
| 7     | [Cd(NH <sub>3</sub> CH <sub>2</sub> COO)(SO <sub>4</sub> )]                                                                                                                                                                                                                                                                                                 | 0°C, 2 h.                                    | 98                                               | [S31]               |
| 8     | <b>Catalyst 1</b><br><b>Catalyst 2</b><br><b>Catalyst 3</b><br><b>Catalyst 4</b>                                                                                                                                                                                                                                                                            | RT, 4 h.<br>RT, 4 h.<br>RT, 4 h.<br>RT, 4 h. | <b>88</b><br><b>98</b><br><b>82</b><br><b>93</b> | <b>Present Work</b> |

|  |  |          |  |  |
|--|--|----------|--|--|
|  |  | RT, 4 h. |  |  |
|--|--|----------|--|--|

**Table S17.** Comparison of the catalytic activity with reported cyclic ketal and ester formation reaction catalyzed by various catalysts.

| Entry | Catalyst                                                                                                                                                     | Temperature (°C) and Time | Yield of cyclic ketal formation (%) | Yield of ester formation (%) | Ref.                |
|-------|--------------------------------------------------------------------------------------------------------------------------------------------------------------|---------------------------|-------------------------------------|------------------------------|---------------------|
| 1     | [Zn(S <sub>2</sub> O <sub>3</sub> )(C <sub>13</sub> H <sub>14</sub> N <sub>2</sub> )], <b>I</b>                                                              | 60, 12 h.                 | 94                                  | -                            | [S32]               |
|       | [Zn(S <sub>2</sub> O <sub>3</sub> )(C <sub>10</sub> H <sub>10</sub> N <sub>2</sub> ) <sub>2</sub> ], <b>II</b>                                               | 60, 12 h.                 | 92                                  | -                            |                     |
|       | [Zn(S <sub>2</sub> O <sub>3</sub> )(C <sub>12</sub> H <sub>10</sub> N <sub>2</sub> )]·H <sub>2</sub> O, <b>III</b>                                           | 60, 12 h.                 | 91                                  | -                            |                     |
|       | [Zn <sub>3</sub> (S <sub>2</sub> O <sub>3</sub> ) <sub>3</sub> (C <sub>12</sub> H <sub>12</sub> N <sub>2</sub> ) <sub>3</sub> ]·3H <sub>2</sub> O, <b>IV</b> | 60, 12 h.                 | 90                                  | -                            |                     |
| 2     | CuL-Br                                                                                                                                                       | 110, 12 h                 | 67                                  | -                            | [S33]               |
|       | CuL-PF <sub>6</sub>                                                                                                                                          | 110, 12 h                 | 93                                  | -                            |                     |
|       | 2D-Ag                                                                                                                                                        | 110, 12 h                 | 63                                  | -                            |                     |
| 3     | Ag <sub>2</sub> (4,4'-bipy) <sub>2</sub> (O <sub>3</sub> SCH <sub>2</sub> CH <sub>2</sub> SO <sub>3</sub> )·4H <sub>2</sub> O (SLUG-21)                      | 110, 12 h                 | 97                                  | 57                           | [S34]               |
| 4     | [Ag <sub>8</sub> (SO <sub>4</sub> ) <sub>4</sub> (C <sub>3</sub> H <sub>6</sub> N <sub>6</sub> ) <sub>3</sub> ], <b>I</b>                                    | 60, 10 h.                 | 98                                  | 55                           | [S29]               |
| 6     | <b>Catalyst 1</b>                                                                                                                                            | 80 and 60,12 h.           | <b>91</b>                           | <b>61</b>                    | <b>Present Work</b> |
|       | <b>Catalyst 2</b>                                                                                                                                            | 80 and 60,12 h.           | <b>96</b>                           | <b>69</b>                    |                     |
|       | <b>Catalyst 3</b>                                                                                                                                            | 80 and 60,12 h.           | <b>80</b>                           | <b>50</b>                    |                     |
|       | <b>Catalyst 4</b>                                                                                                                                            | 80 and 60,12 h.           | <b>88</b>                           | <b>55</b>                    |                     |

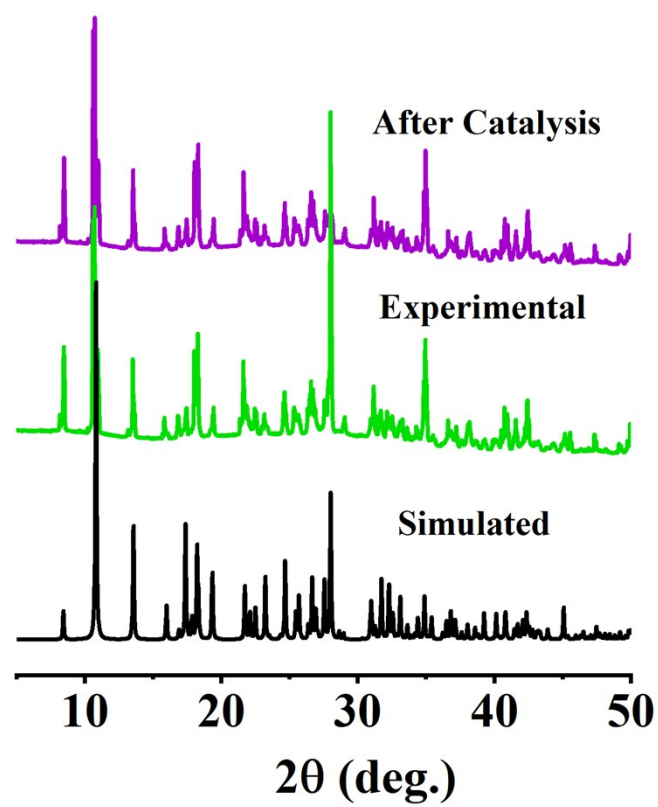

**Figure S1:** X-ray powder diffraction (Cu  $K\alpha$ ) pattern of compound 1; simulated (black), as-synthesized (light green), after catalysis (violet), respectively.

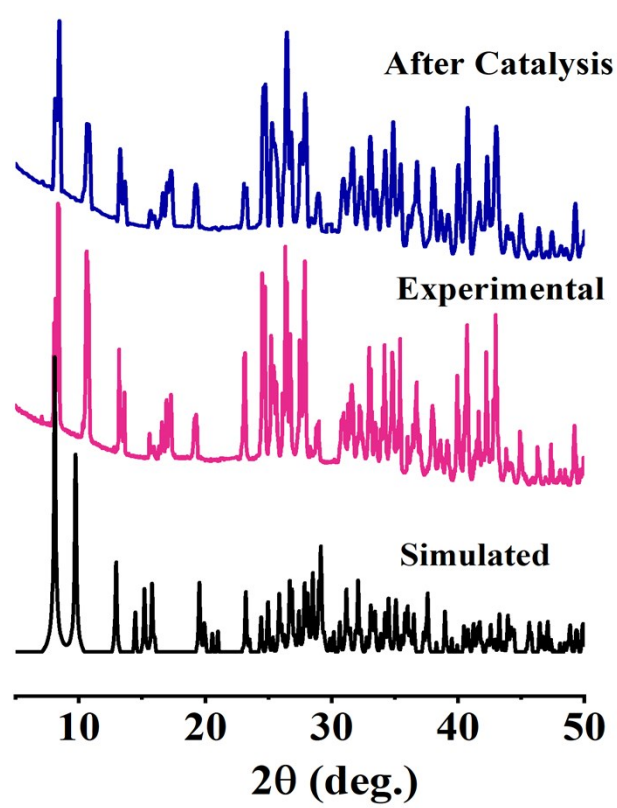

**Figure S2:** X-ray powder diffraction (Cu  $K\alpha$ ) pattern of compound 2; simulated (black), as-synthesized (pink), after catalysis (royal blue), respectively.

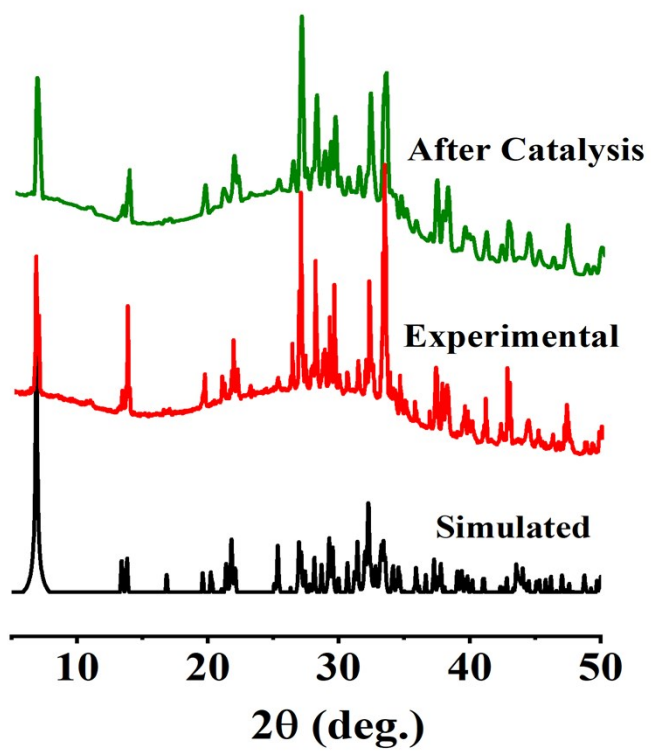

**Figure S3:** X-ray powder diffraction (Cu  $K\alpha$ ) pattern of compound 3; simulated (black), as-synthesized (red), after catalysis (green), respectively.

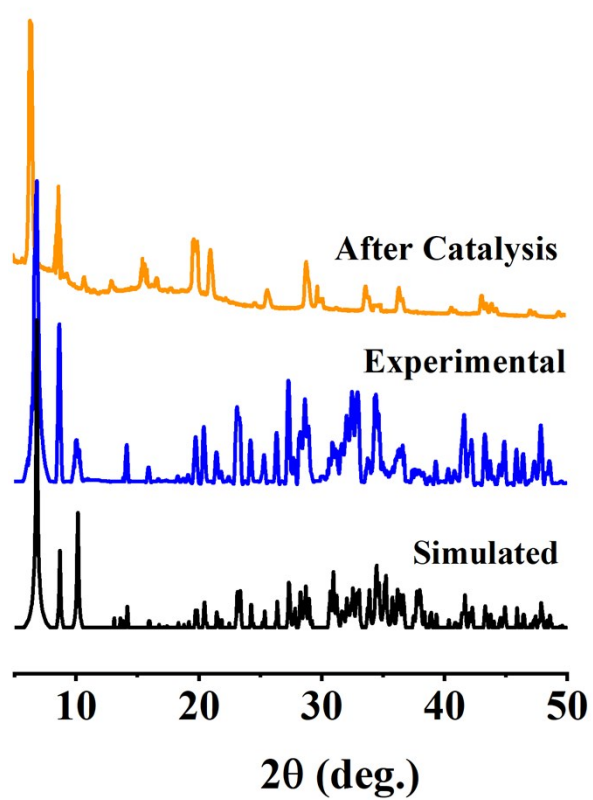

**Figure S4:** X-ray powder diffraction (Cu  $K\alpha$ ) pattern of compound **4**; simulated (black), as-synthesized (blue), after catalysis (pink), respectively.

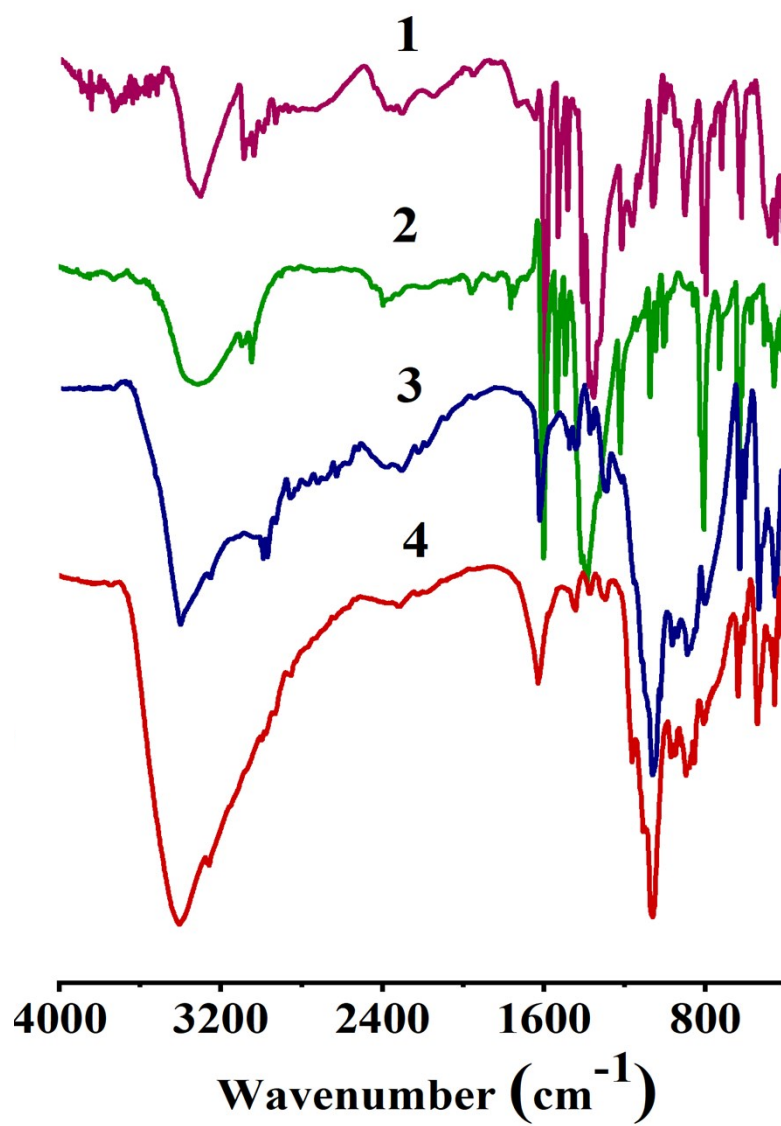

Figure S5: FT-IR spectra of compounds 1 – 4.

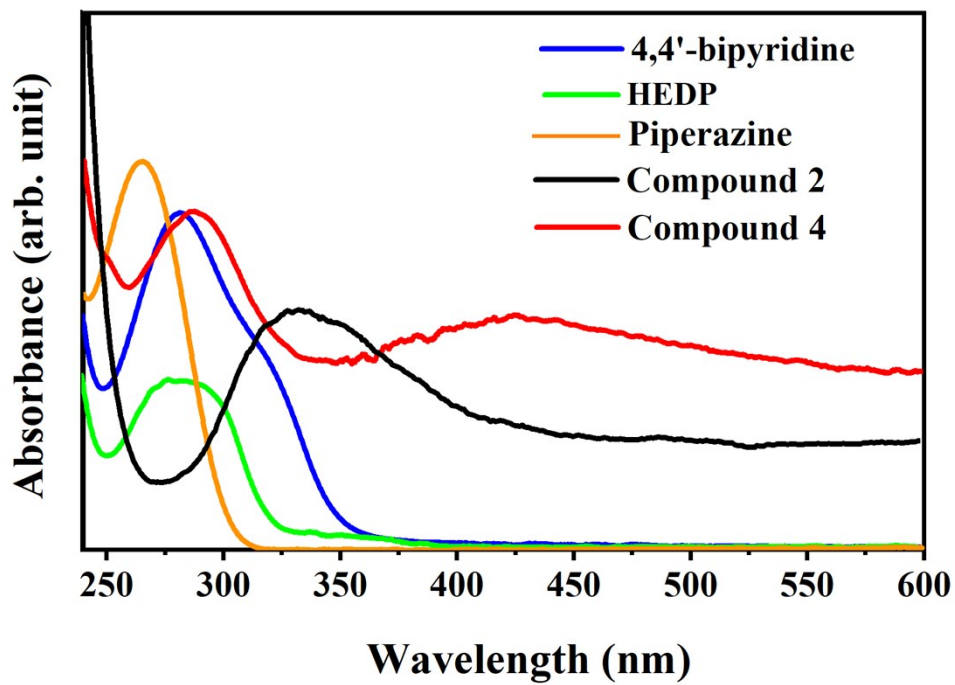

**Figure S6:** The UV-Visible absorption spectrum of 4,4'-bipyridine, HEDP, piperazine and compounds 1 – 4 at room temperature.



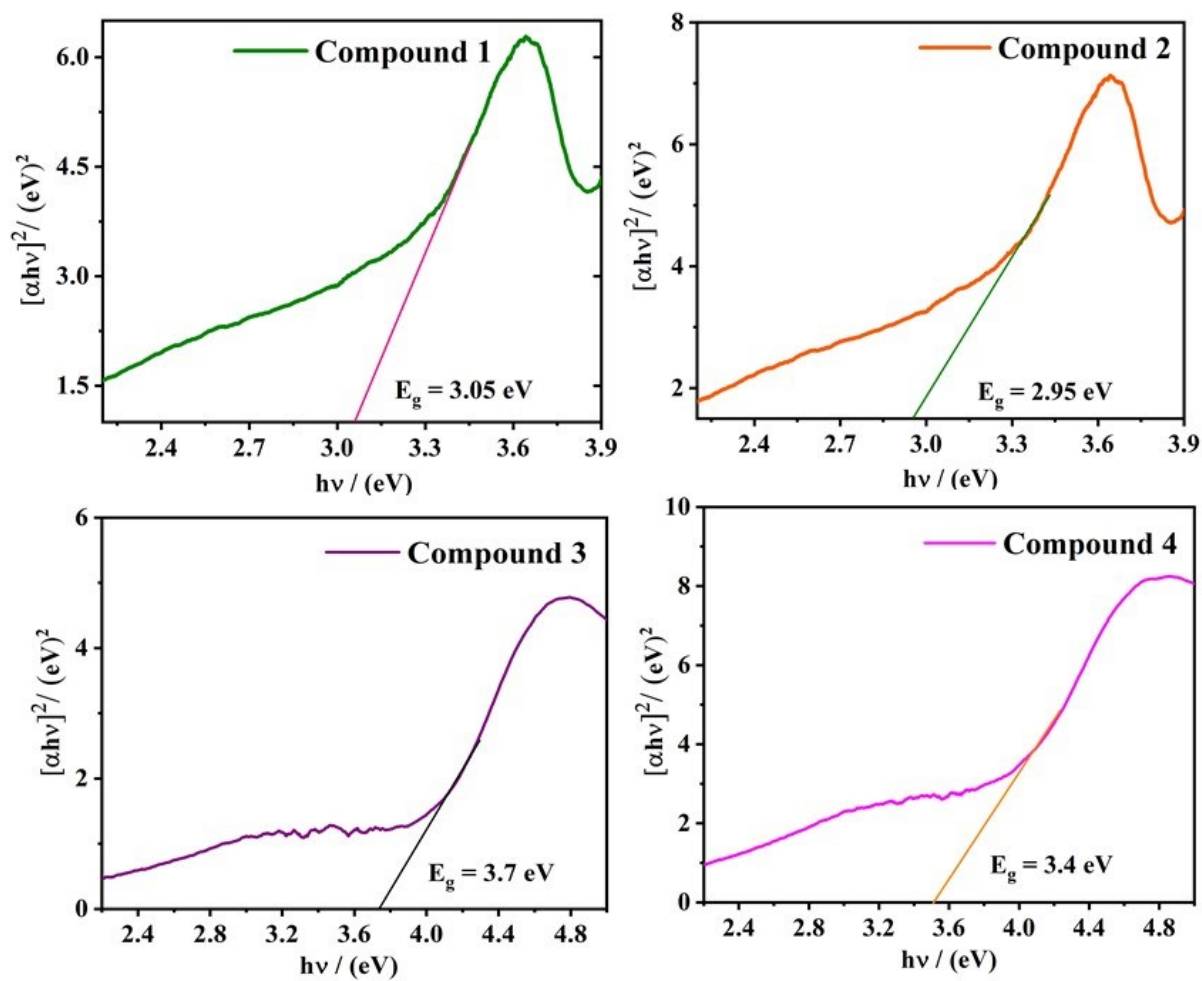

**Figure S7:** Optical band gap measurement from UV-Visible spectroscopy using Tauc model for Compounds 1 – 4.

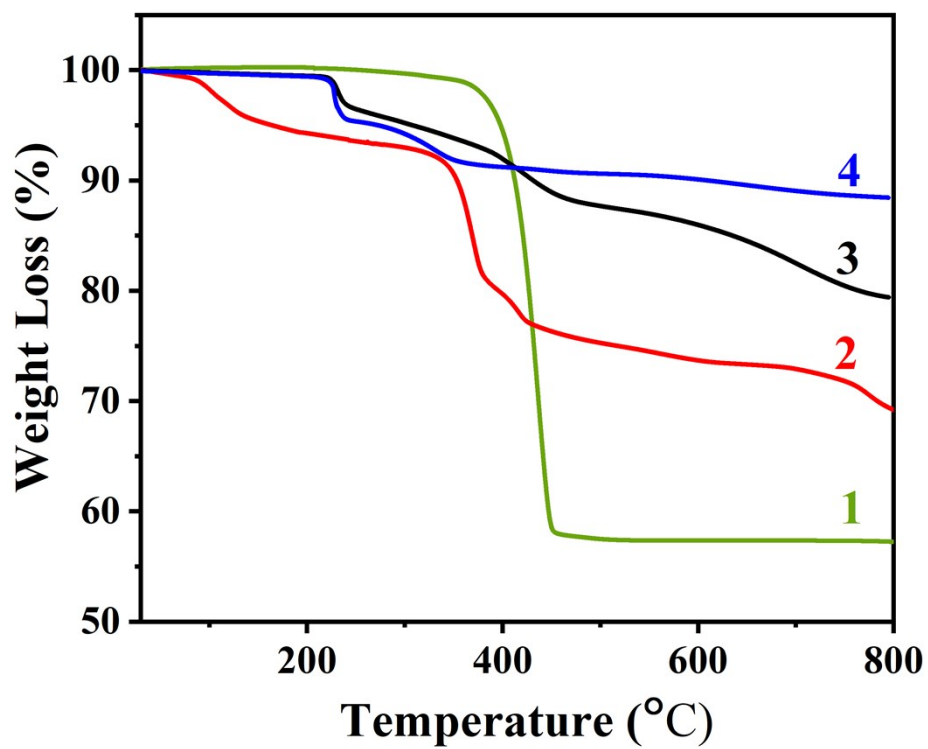

Figure S8: TGA plot for compounds 1 – 4.

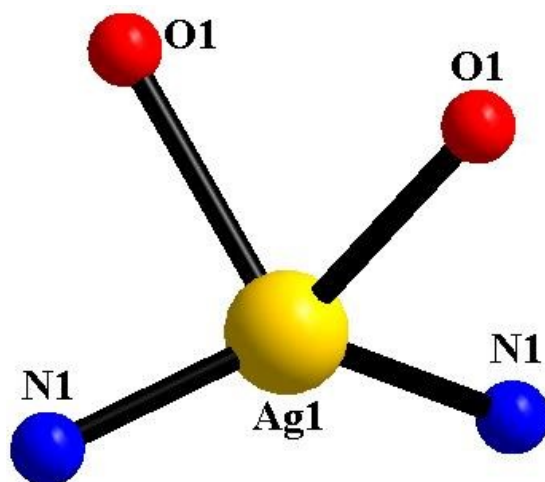

**Figure S9:** Coordination environment of silver ion (Ag1) for compound **1**.

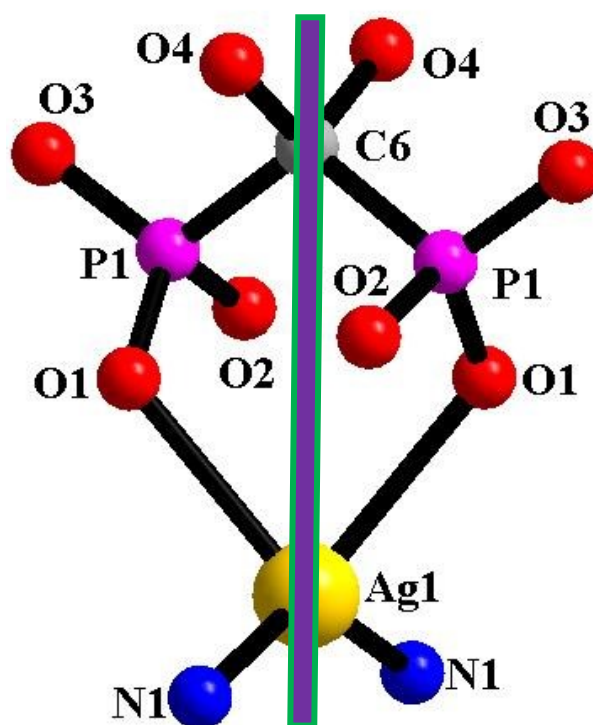

**Figure S10:**  $\eta^2, \mu_1$  – coordination mode of hedp unit in compound **1**. The structure is drawn by taking  $P 2/n$  space group. The  $-\text{CH}_3$  and  $-\text{OH}$  groups of the diphosphonate ligand were found same in the structure. But the non-centrosymmetric  $P n$  space group can distinguish two different groups (as given in Figure 1 in the manuscript).

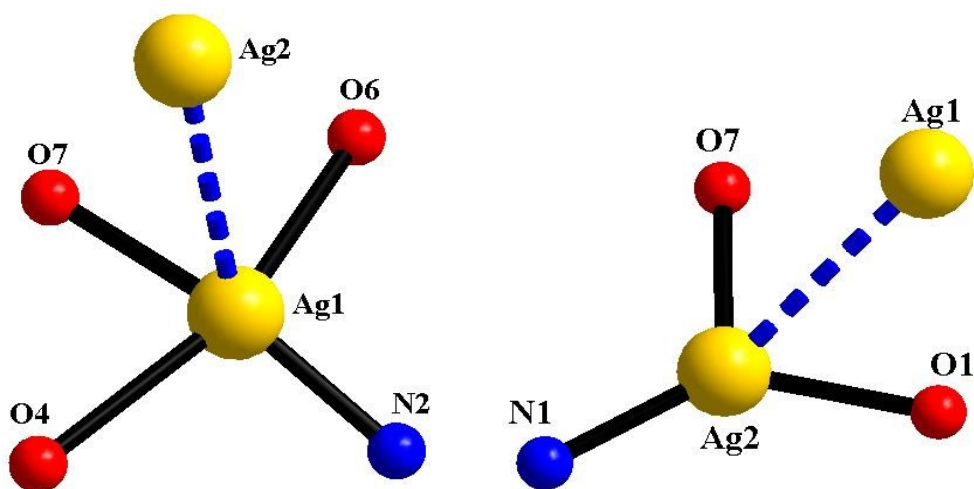

**Figure S11:** Coordination environment of different silver ions (Ag1 and Ag 2) for compound 2.

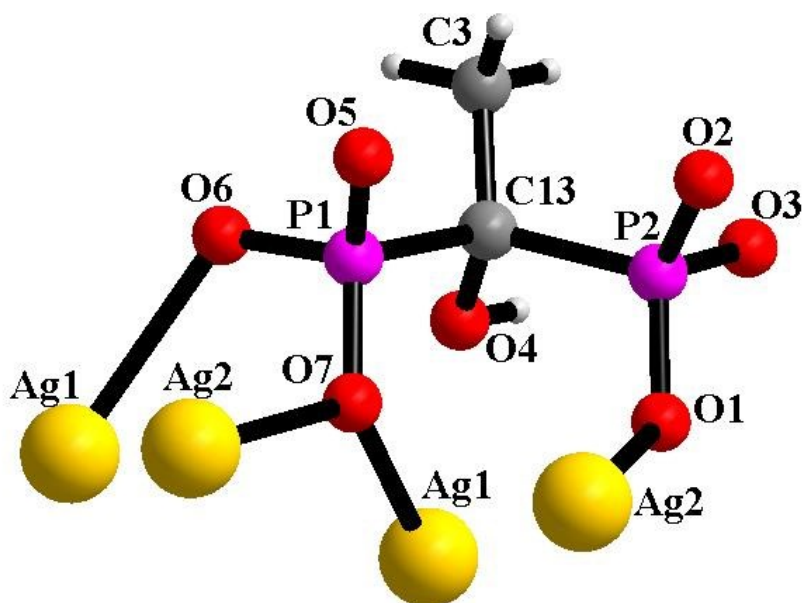

**Figure S12:**  $\eta^2, \mu_3$  and  $\eta^1, \mu_1$  – coordination mode of hedp unit in compound 2.

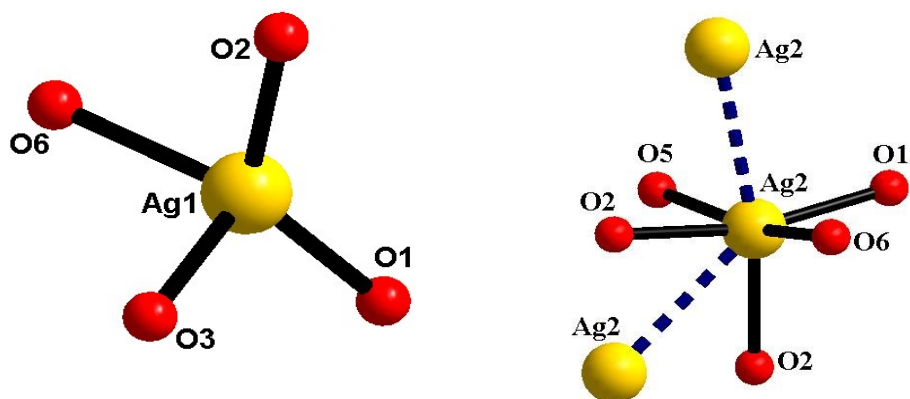

Figure S13: Coordination environment of different silver ions (Ag1 and Ag2) for compound 3.

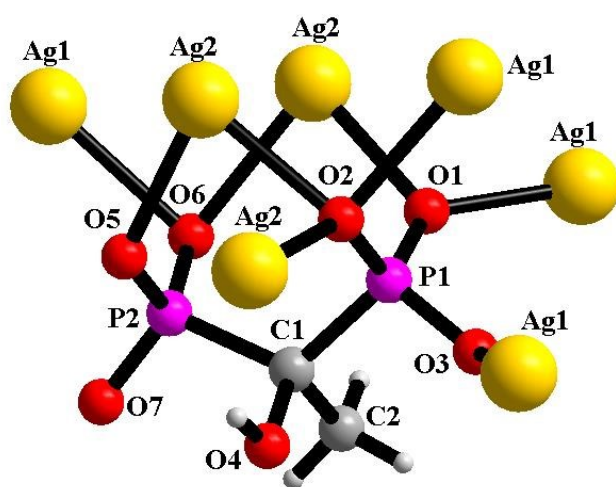

Figure S14:  $\eta^3, \mu_6$  and  $\eta^2, \mu_3$  – coordination mode of hedp unit in compound 3.

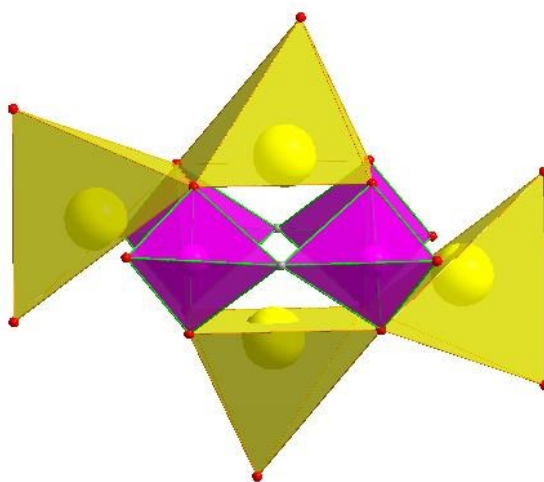

Figure S15: Observed pseudo SBU-8 unit in compound 3.

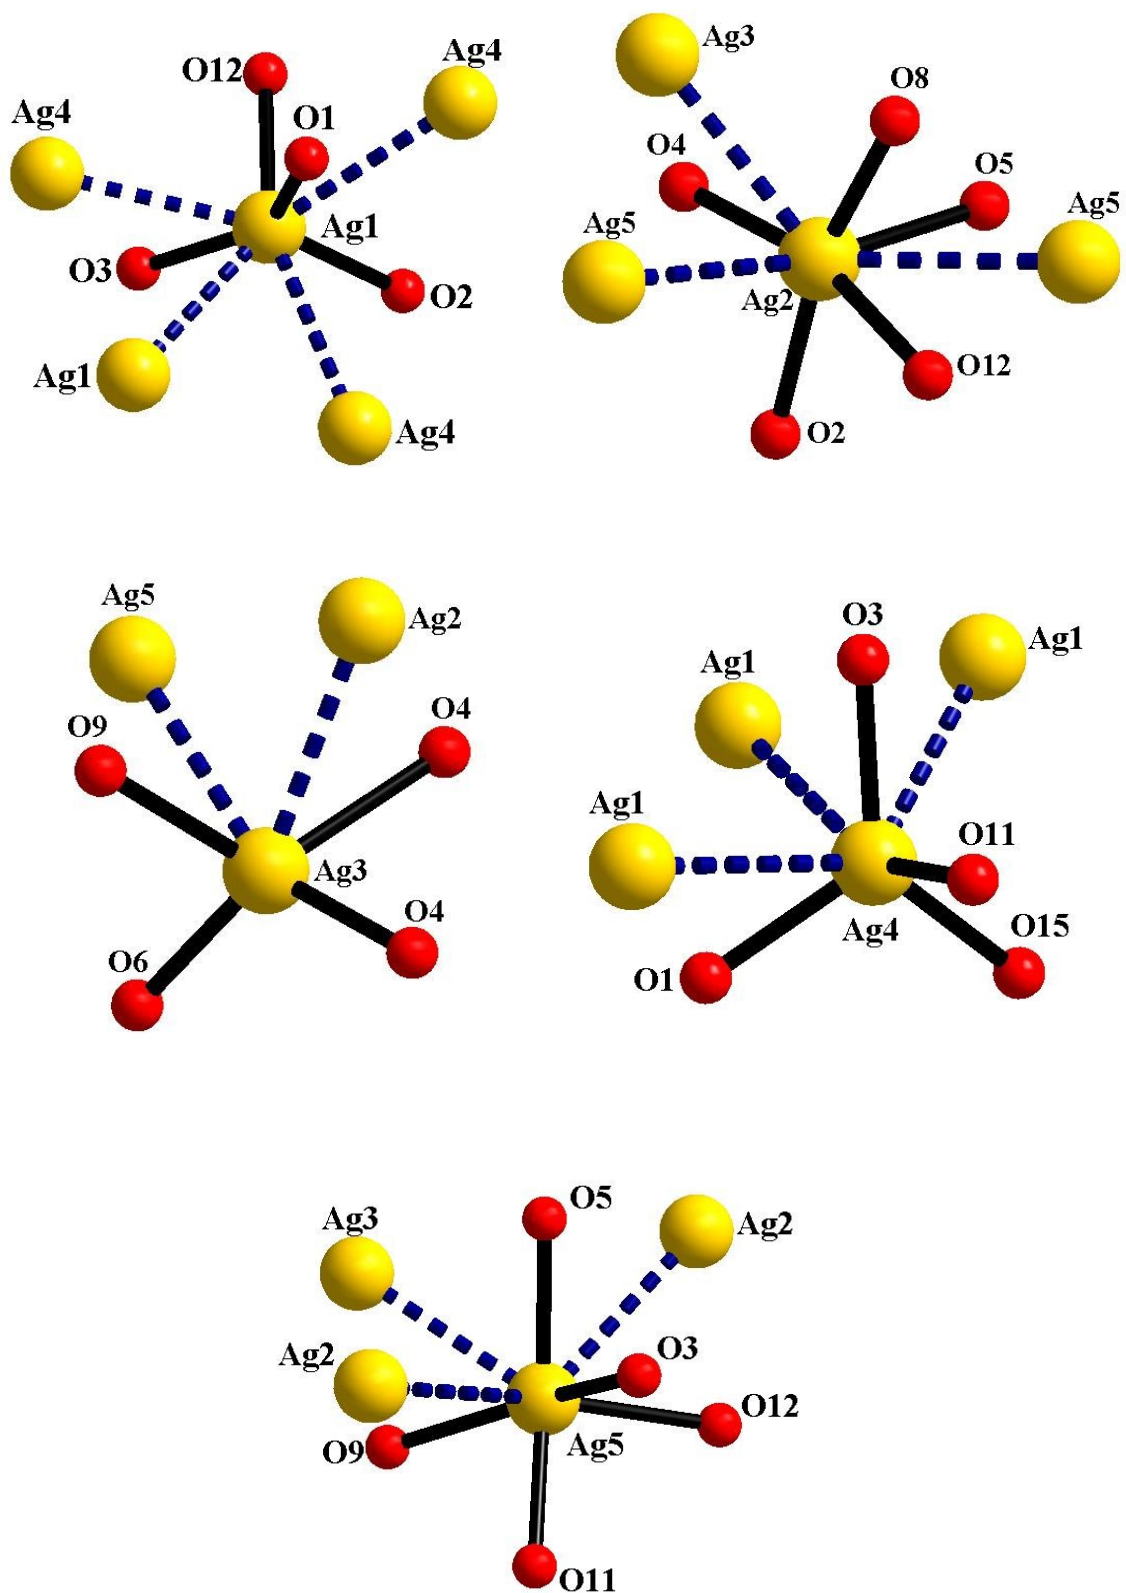

**Figure S16:** Coordination environment of different silver ions (Ag1 to Ag5) for compound 4.

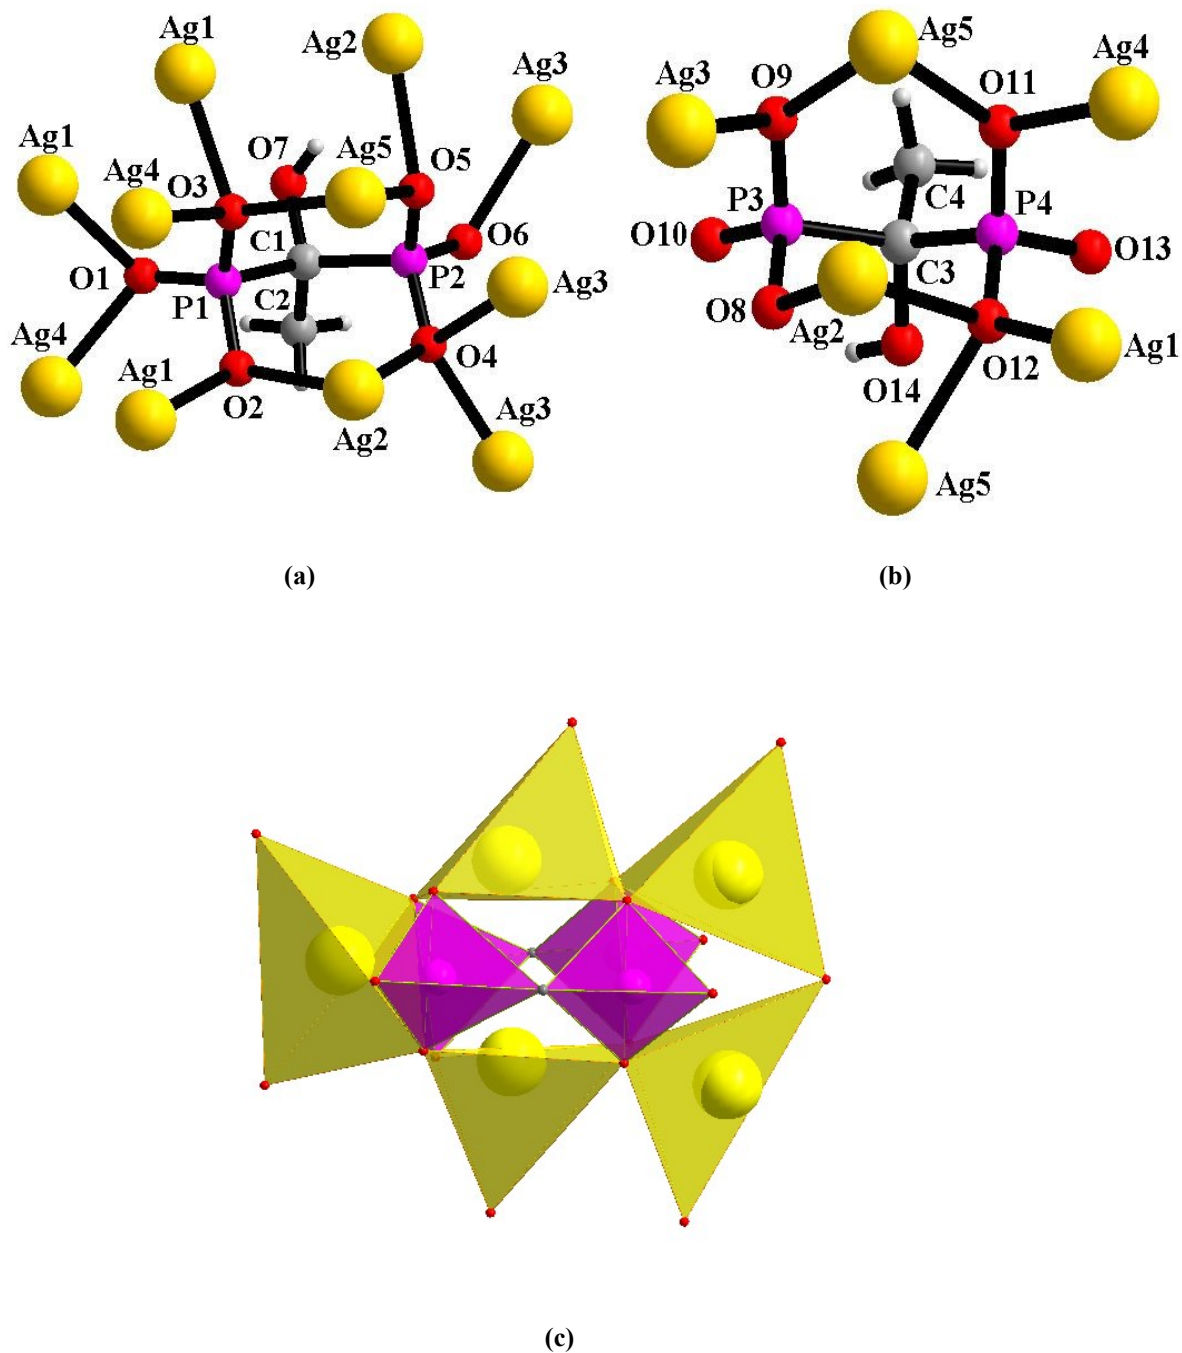

**Figure S17:** (a) represent  $\eta^3, \mu_7$  and  $\eta^3, \mu_6$  -coordination modes of hedp(1) unit and (b) represent  $\eta^2, \mu_3$  and  $\eta^2, \mu_5$  -coordination modes of hedp(2) unit in compound - II. (c) Observed pseudo SBU-9 unit in the compound 4.

(a)

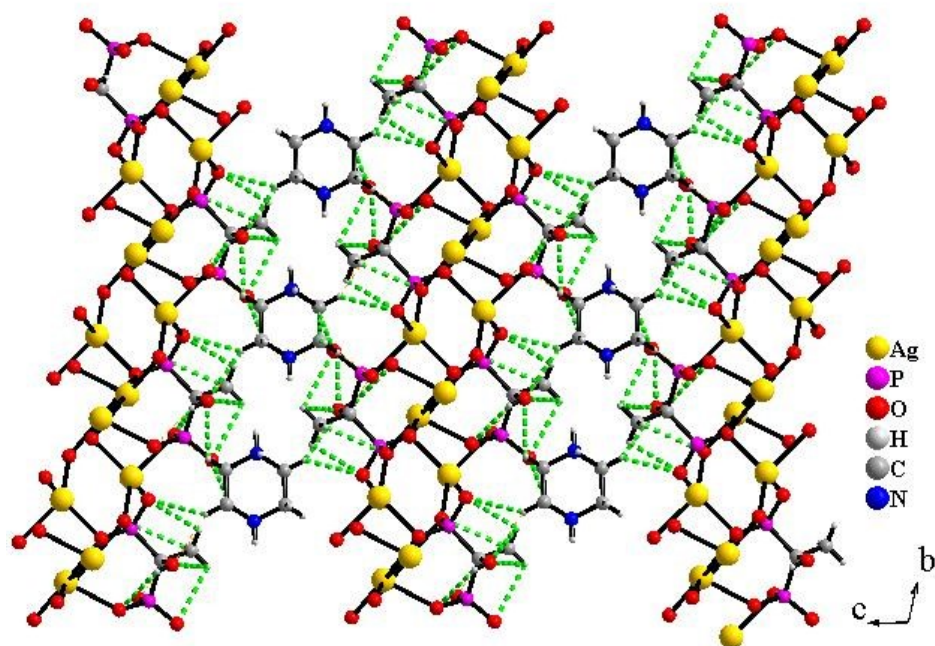

(b)

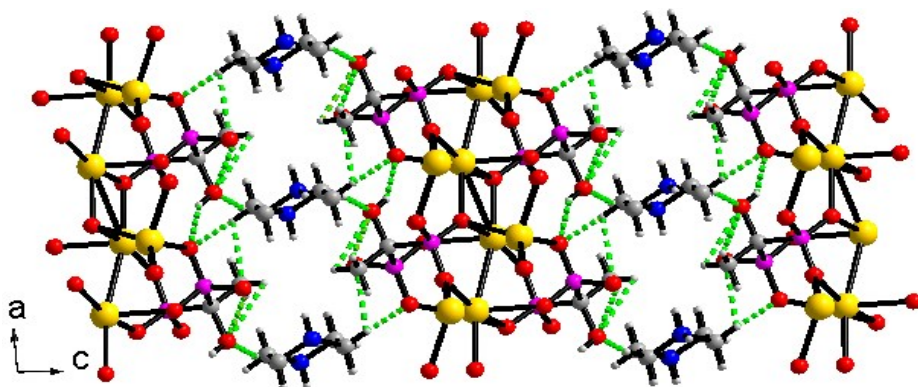

**Figure S18:** (a) and (b) indicates the observed hydrogen bonding interactions in overall 2D packing structure of compounds 3 and 4 respectively.



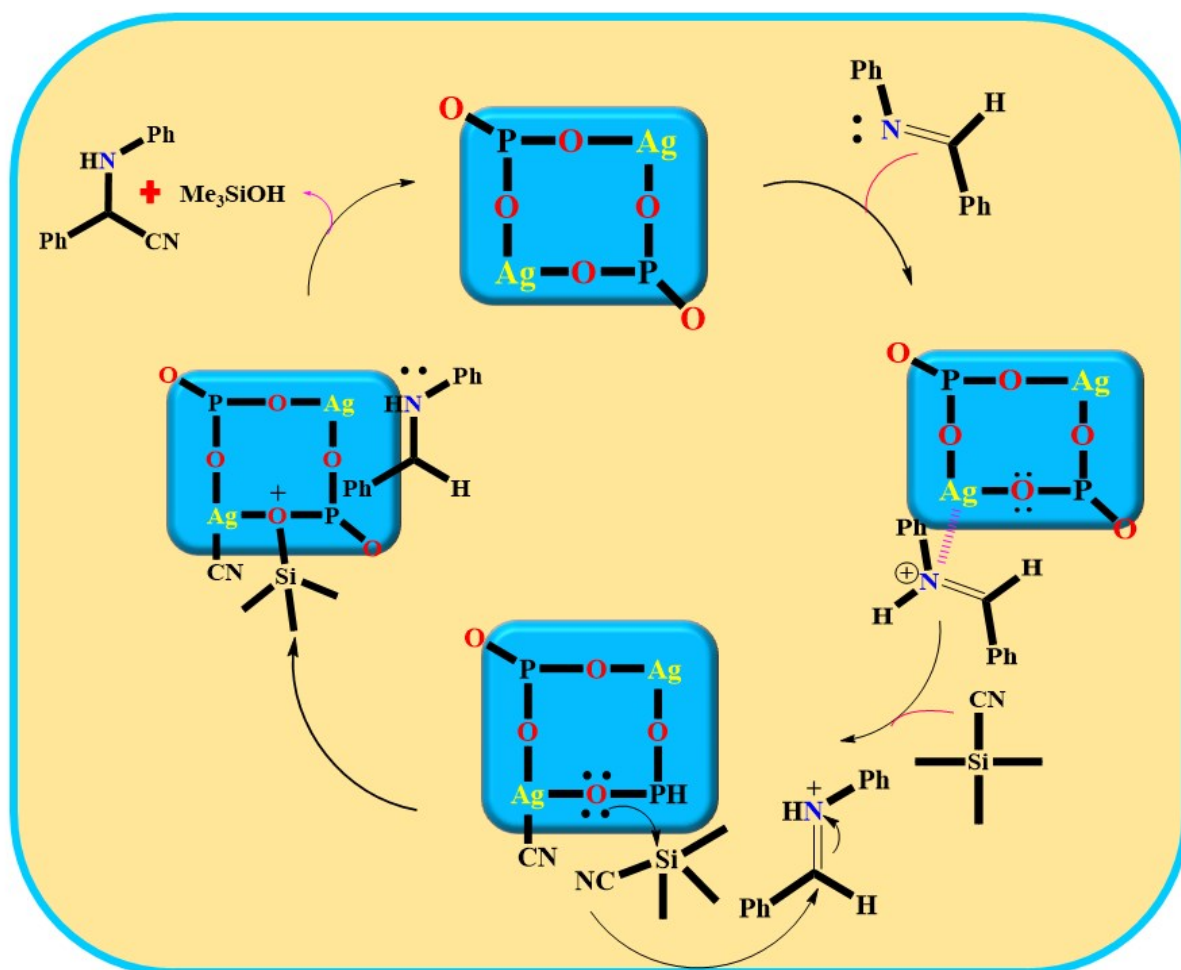

**Scheme S1:** Proposed mechanism for the Lewis acid catalyzed cyanosilylation of imine.

Here, a weak bond is formed between the lone pair of imine nitrogen and the Lewis acidic silver sites. The oxygen atoms are connected with silver metal ensuring an electron-rich nucleophilic center which facilitates the transfer of electrons to the trimethylsilyl group of TMS-CN, resulting in the formation of a weakly coordinated Si-O bond. The terminal water molecule, which may enhance the formation of silicon intermediate, comprises the weaker C-Si bond and enhances the nucleophilicity of cyanide group to form a bond with the Lewis acidic silver surface. Afterward, the nucleophilic -CN group transferred the electrons to carbon and produced cyanosilylated species which eliminate as a product in the next step.

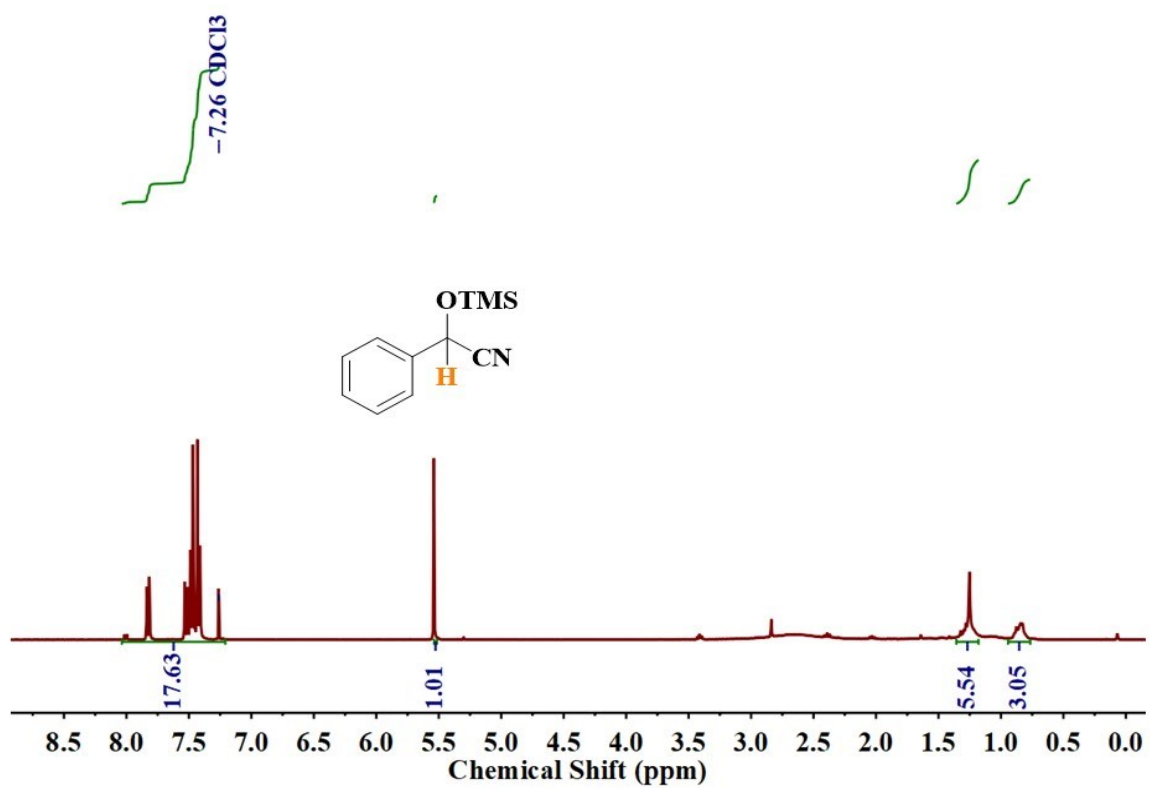

Figure S19: <sup>1</sup>H-NMR spectrum corresponding to Table 4, entry 1.

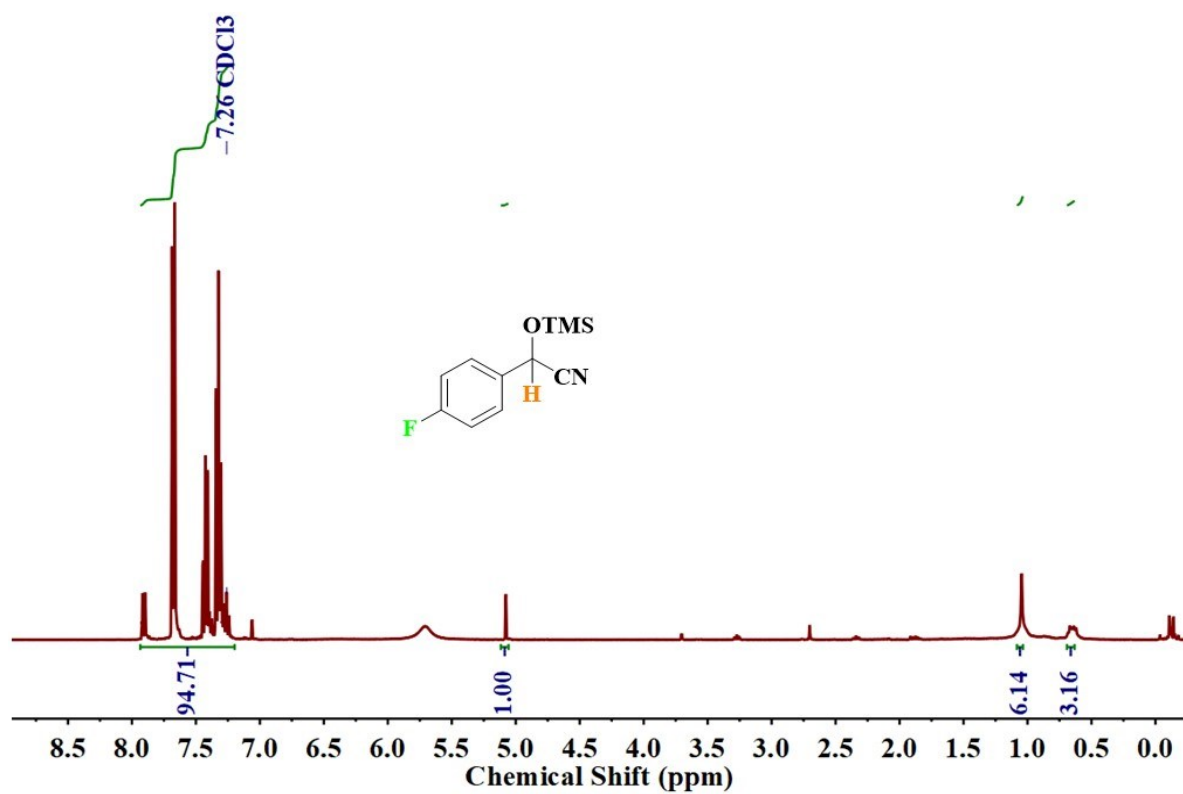

Figure S20: <sup>1</sup>H-NMR spectrum corresponding to Table 4, entry 2.

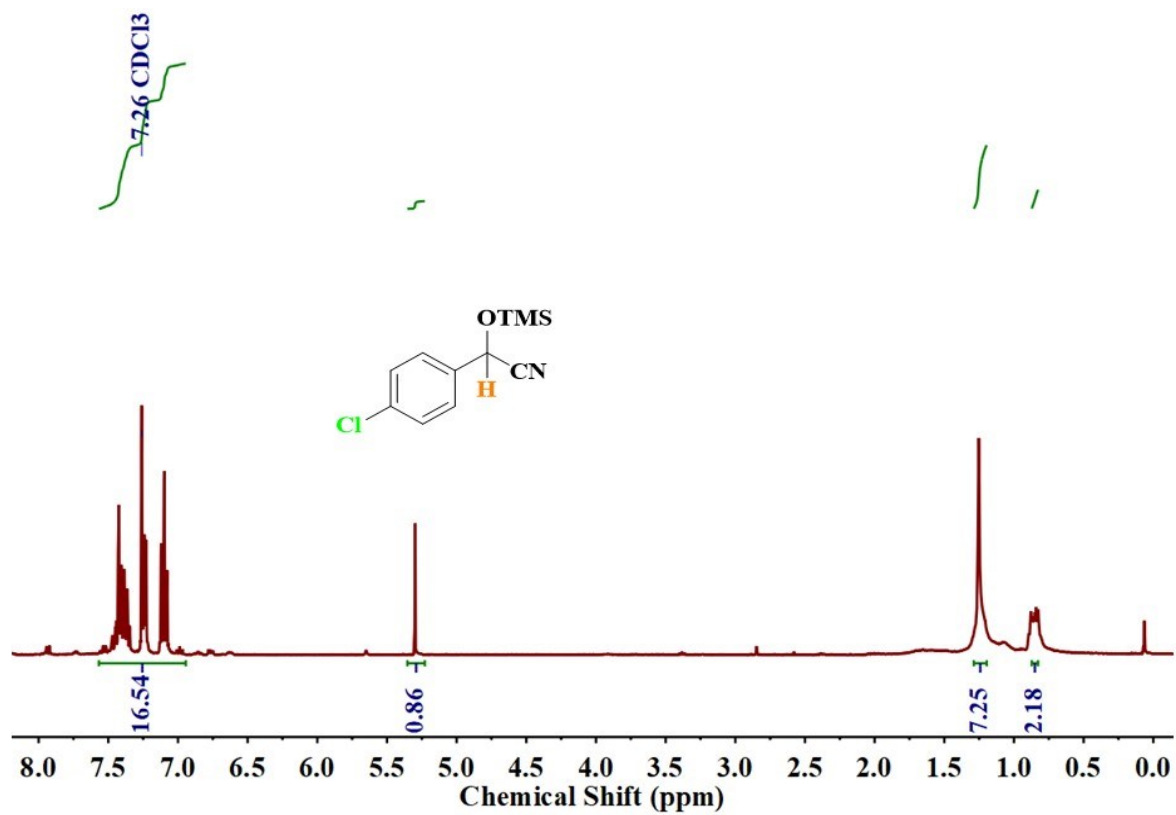

Figure S21: <sup>1</sup>H-NMR spectrum corresponding to Table 4, entry 3.

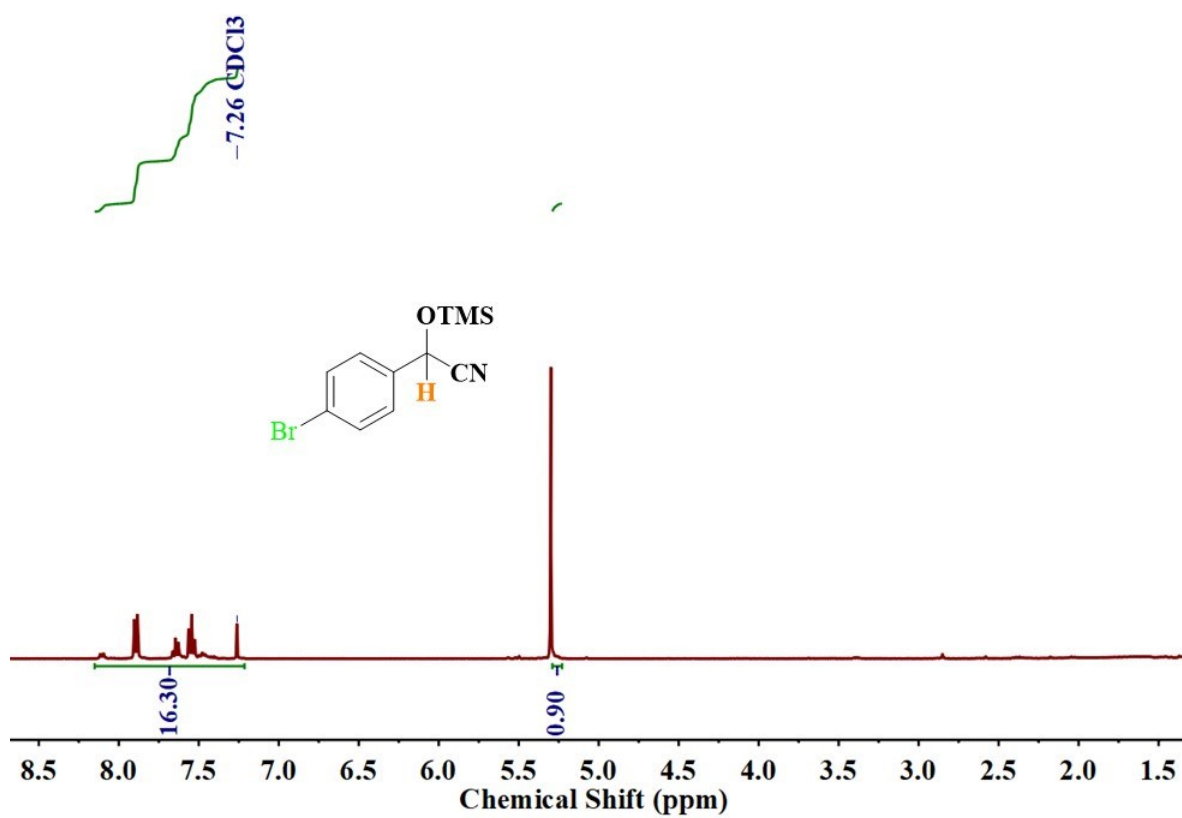

Figure S22:  $^1\text{H-NMR}$  spectrum corresponding to Table 4, entry 4.

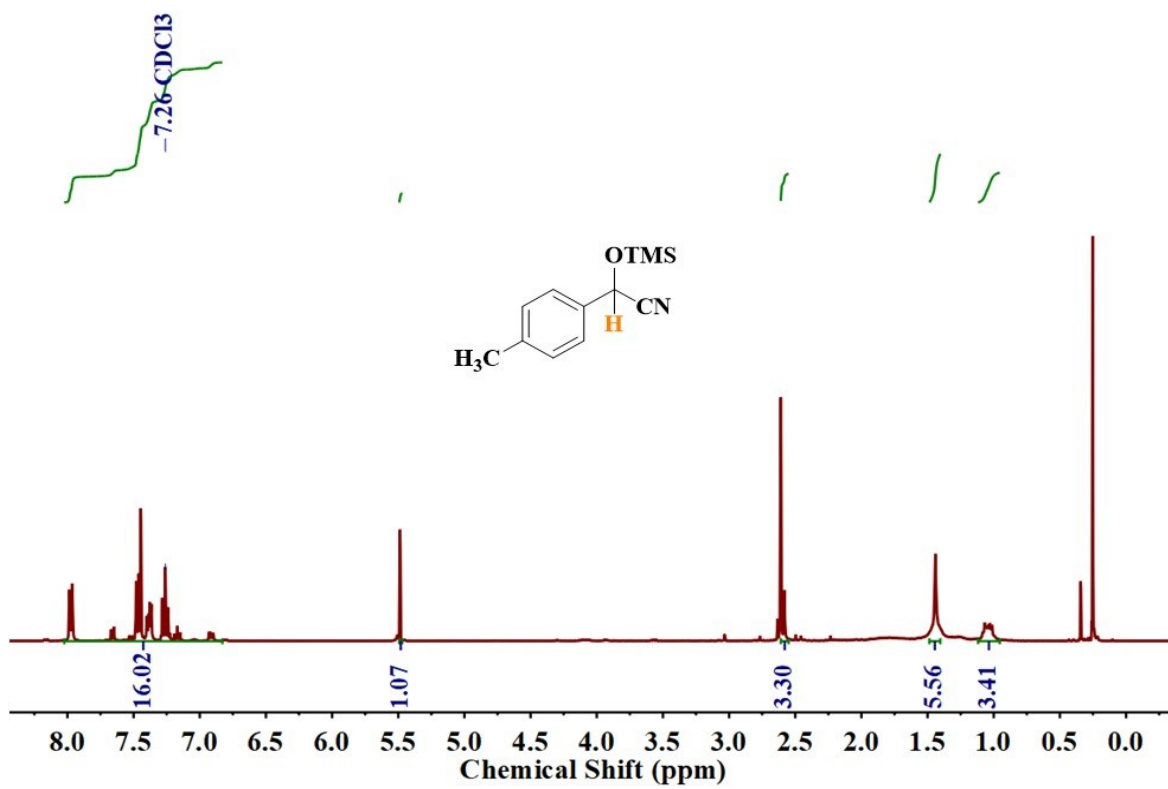

Figure S23:  $^1\text{H-NMR}$  spectrum corresponding to Table 4, entry 5.

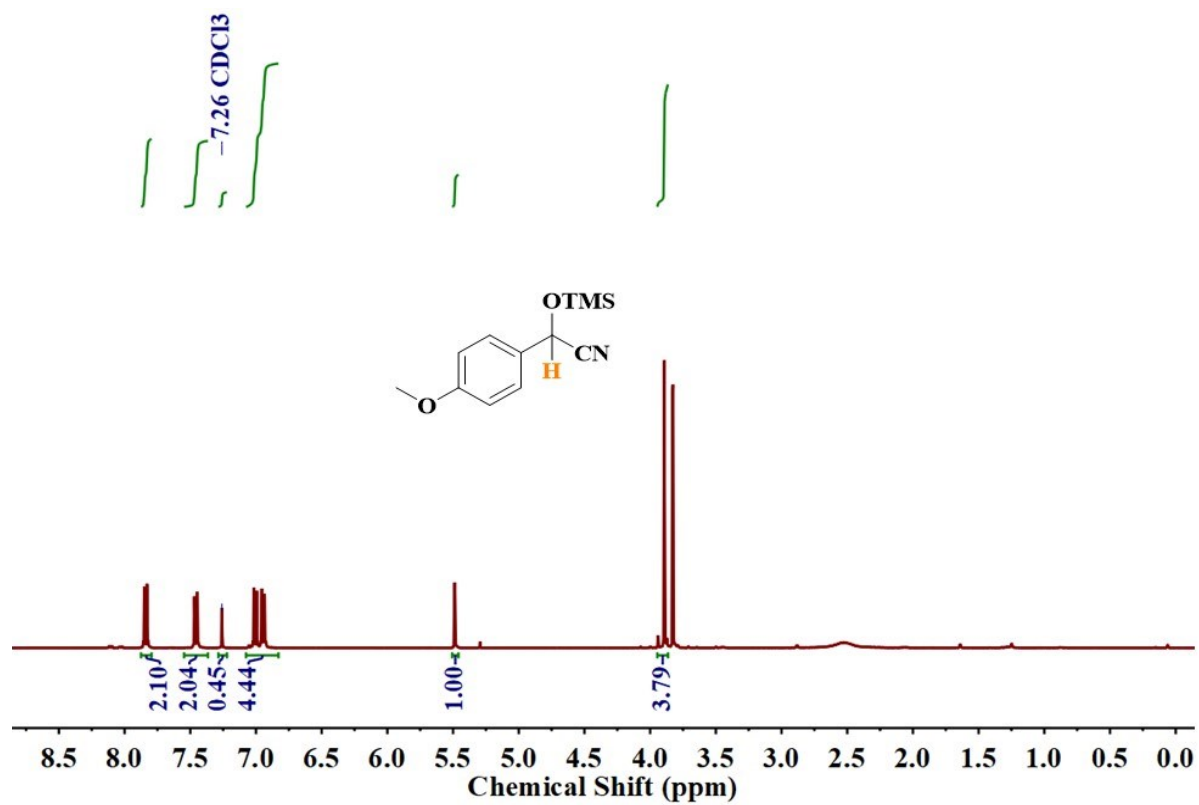

Figure S24: <sup>1</sup>H-NMR spectrum corresponding to Table 4, entry 6.

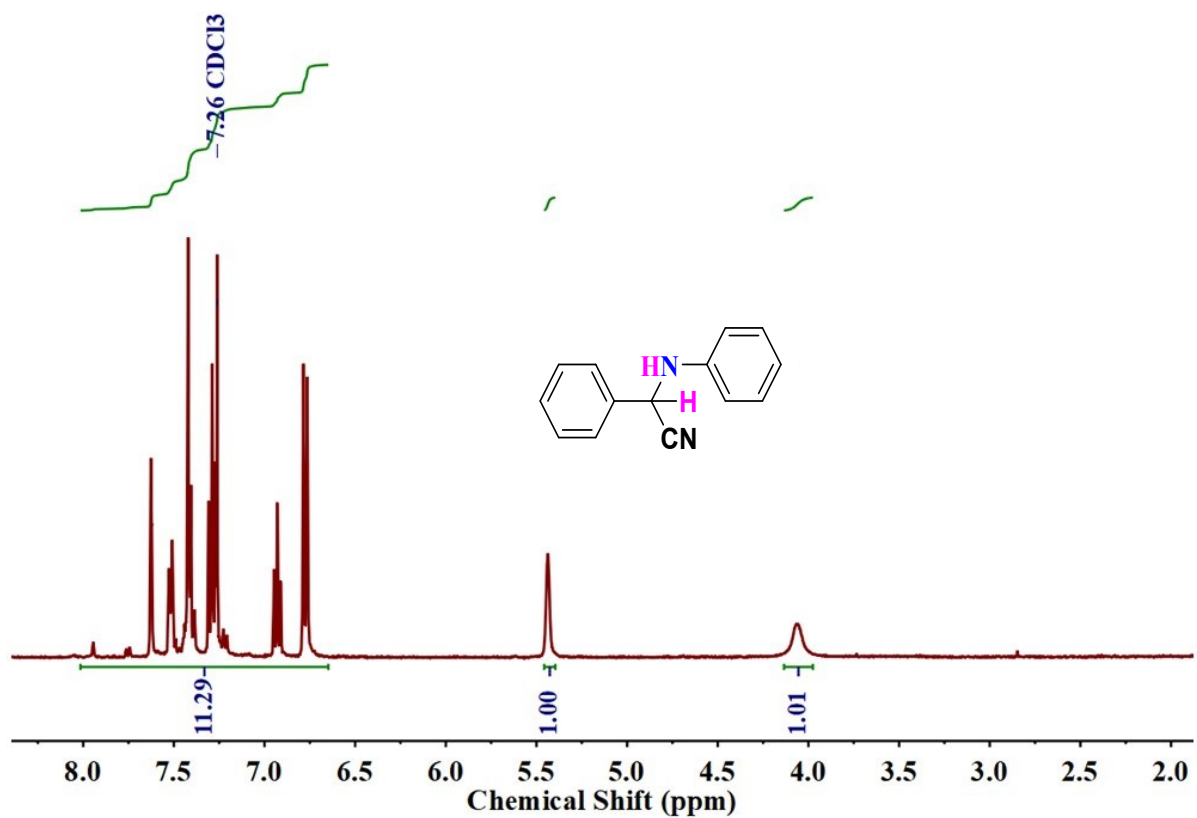

Figure S25:  $^1\text{H-NMR}$  spectrum corresponding to Table 5, entry 1.



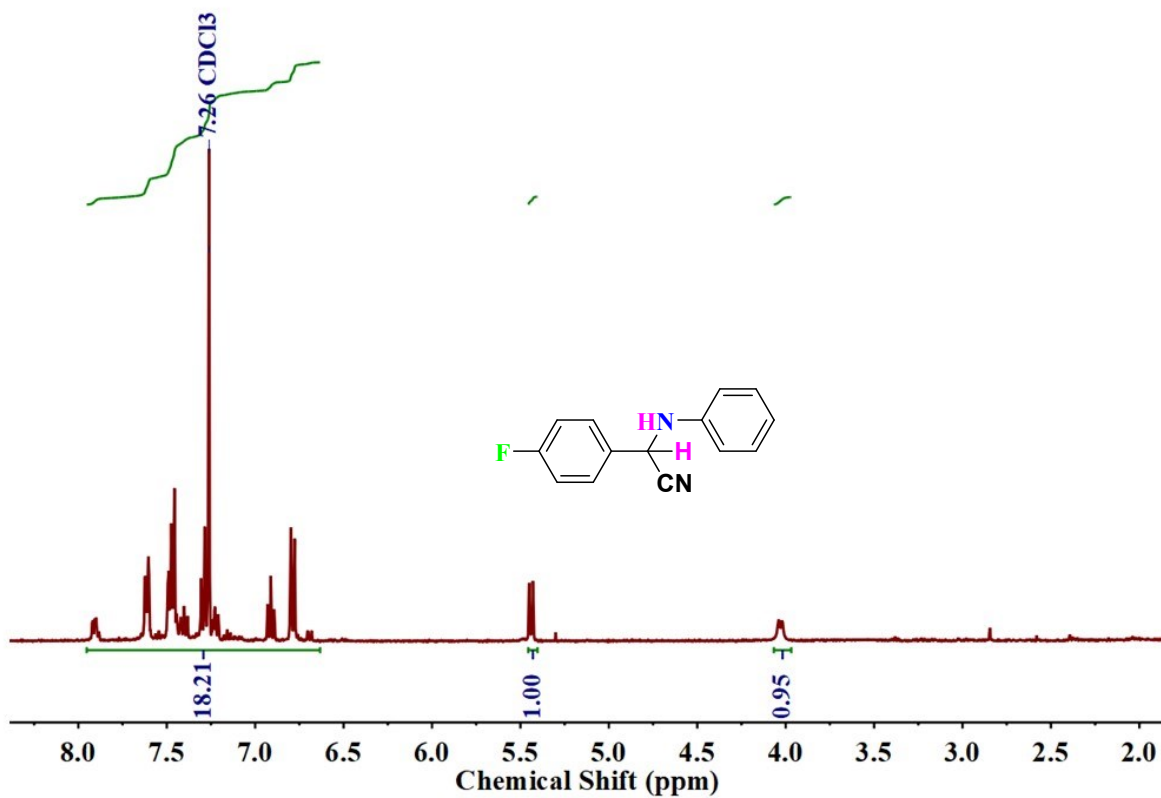

Figure S26: <sup>1</sup>H-NMR spectrum corresponding to Table 5, entry 2.

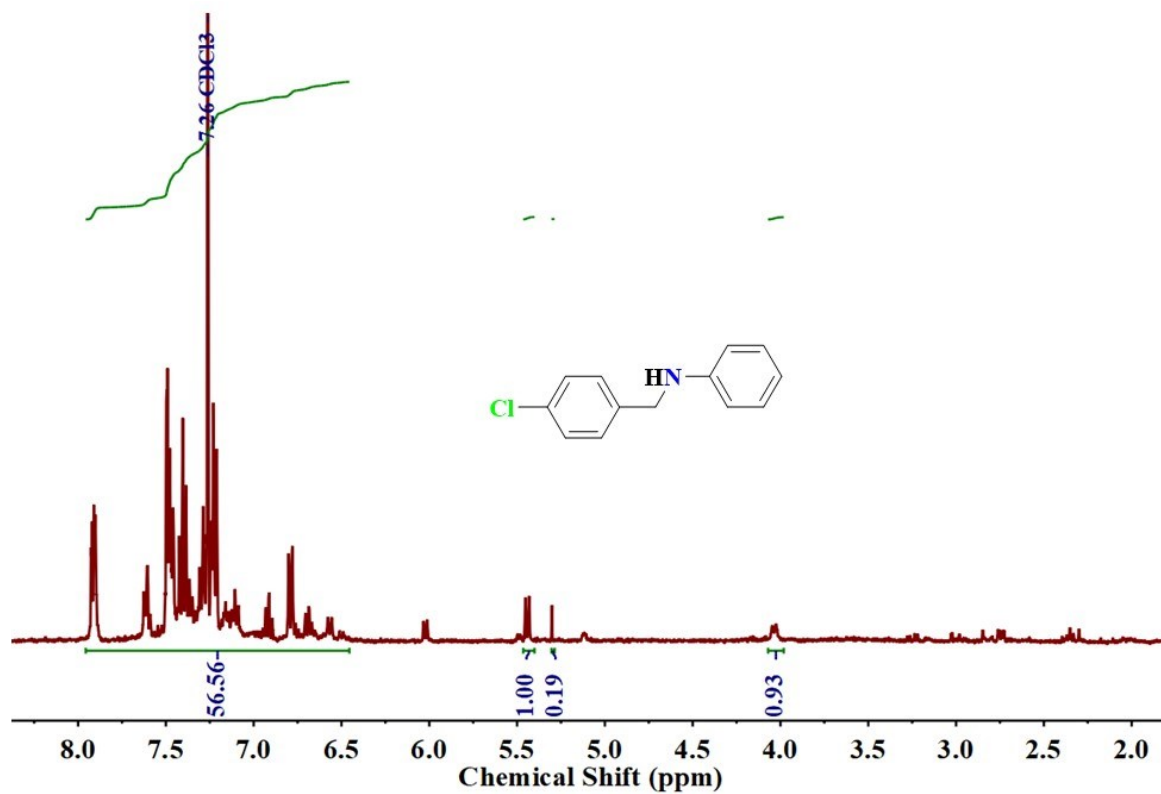

Figure S27: <sup>1</sup>H-NMR spectrum corresponding to Table 5, entry 3.

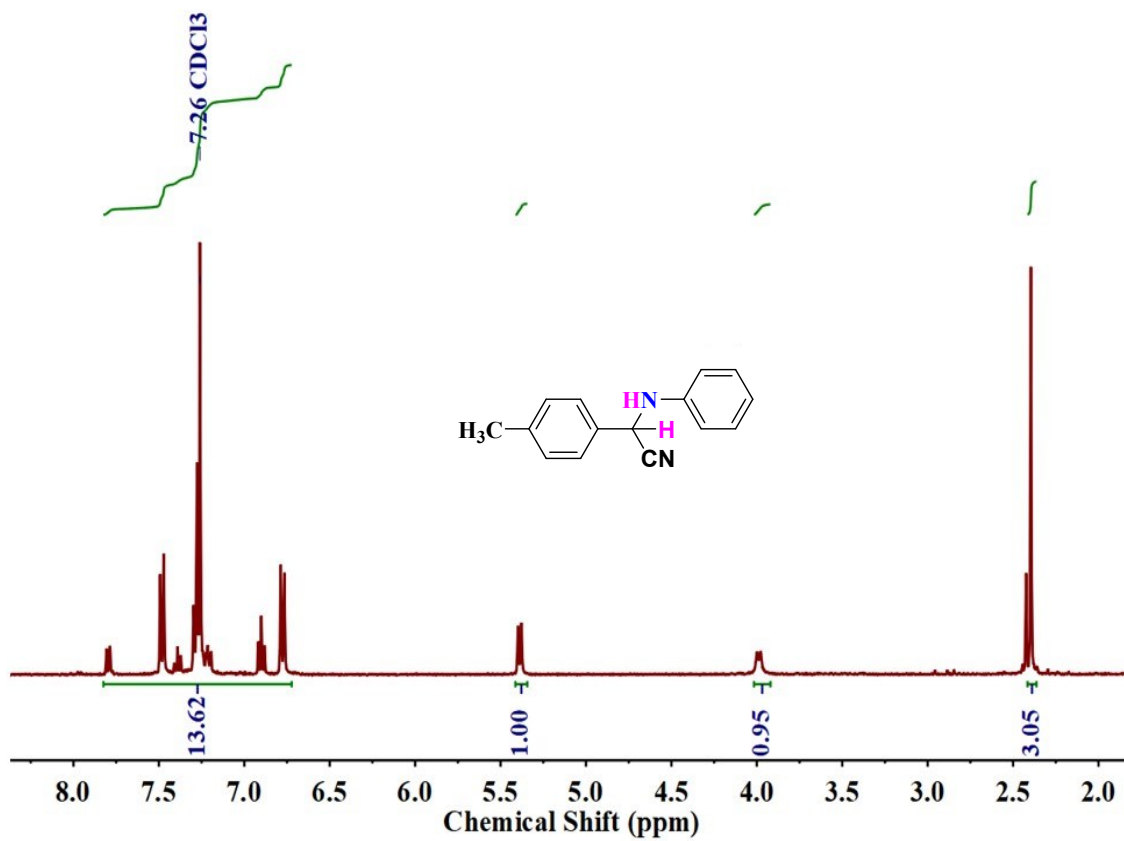

Figure S28: <sup>1</sup>H-NMR spectrum corresponding to Table 5, entry 4.

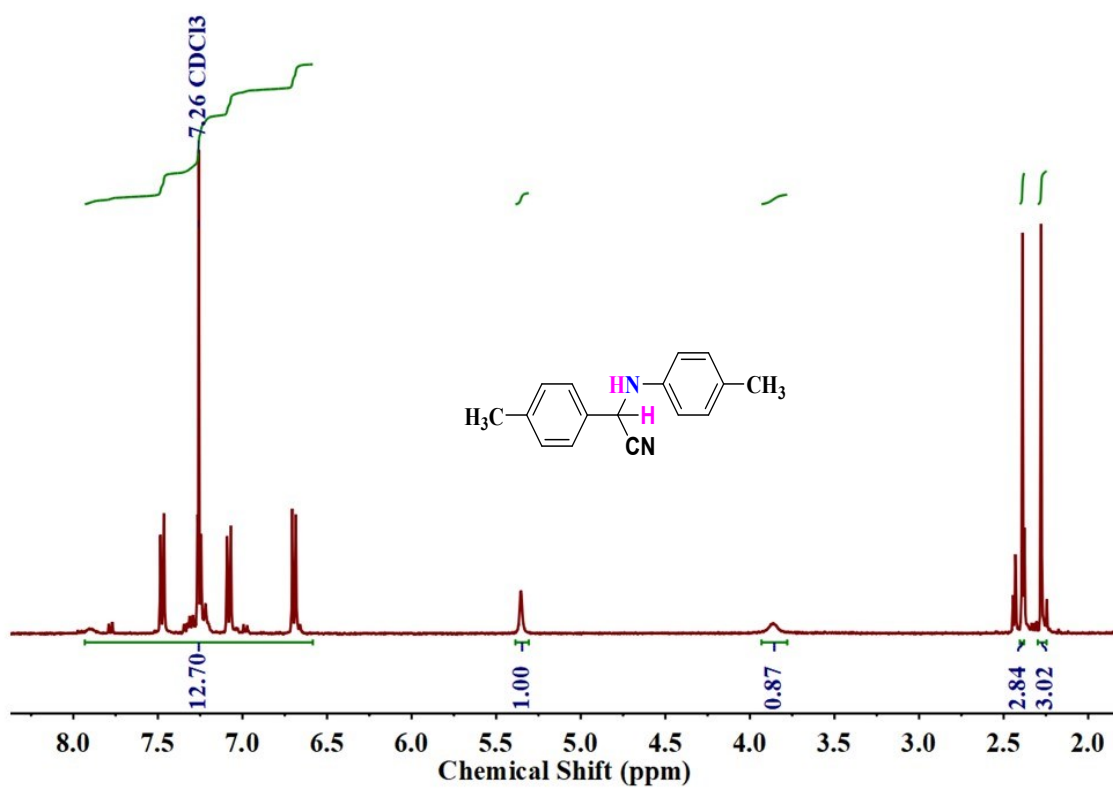

Figure S29: <sup>1</sup>H-NMR spectrum corresponding to Table 5, entry 5.

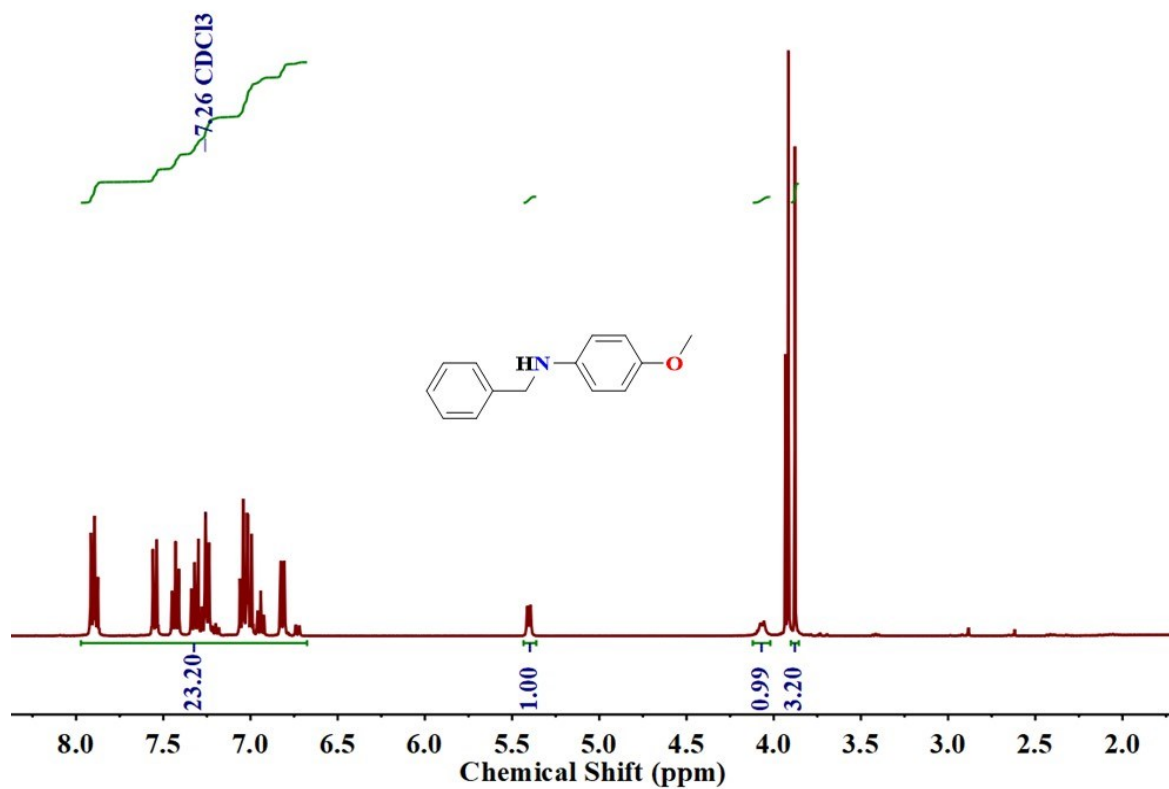

Figure S30: <sup>1</sup>H-NMR spectrum corresponding to Table 5, entry 6.

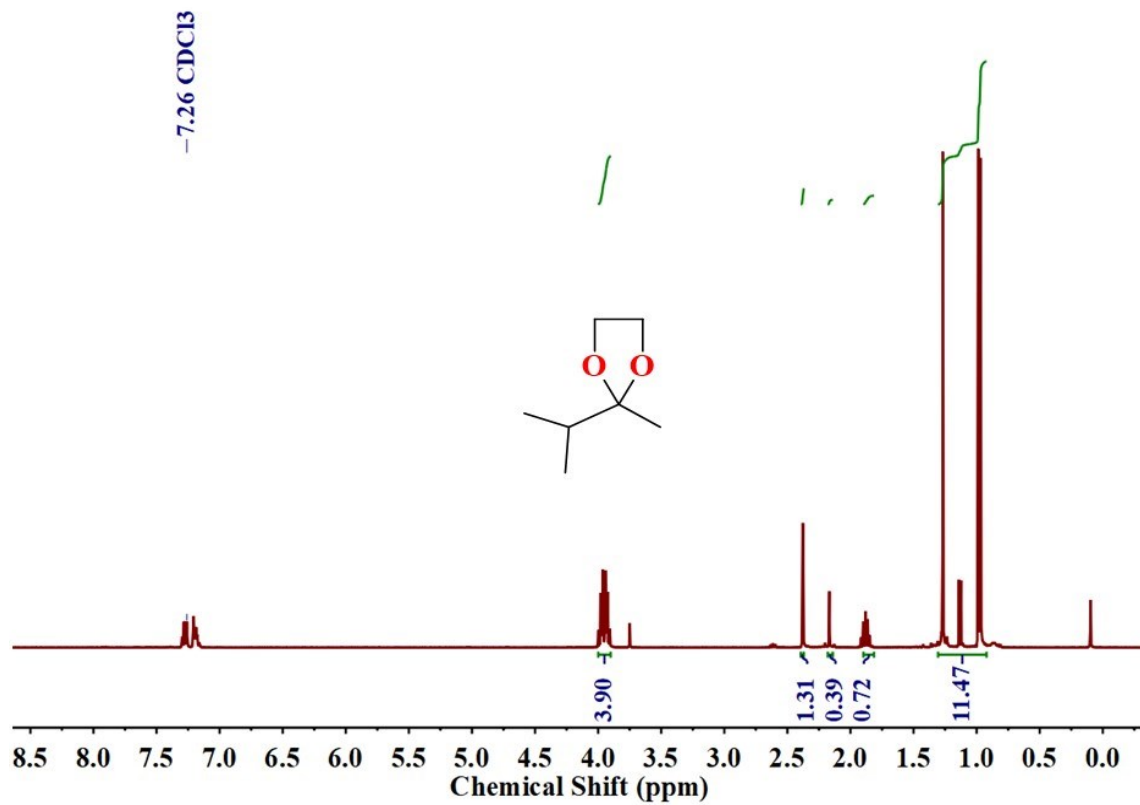

**Figure S31:** <sup>1</sup>H-NMR spectrum of cyclic ketal formation corresponding to Table 6, entry with 3-Methyl-2-butanone.

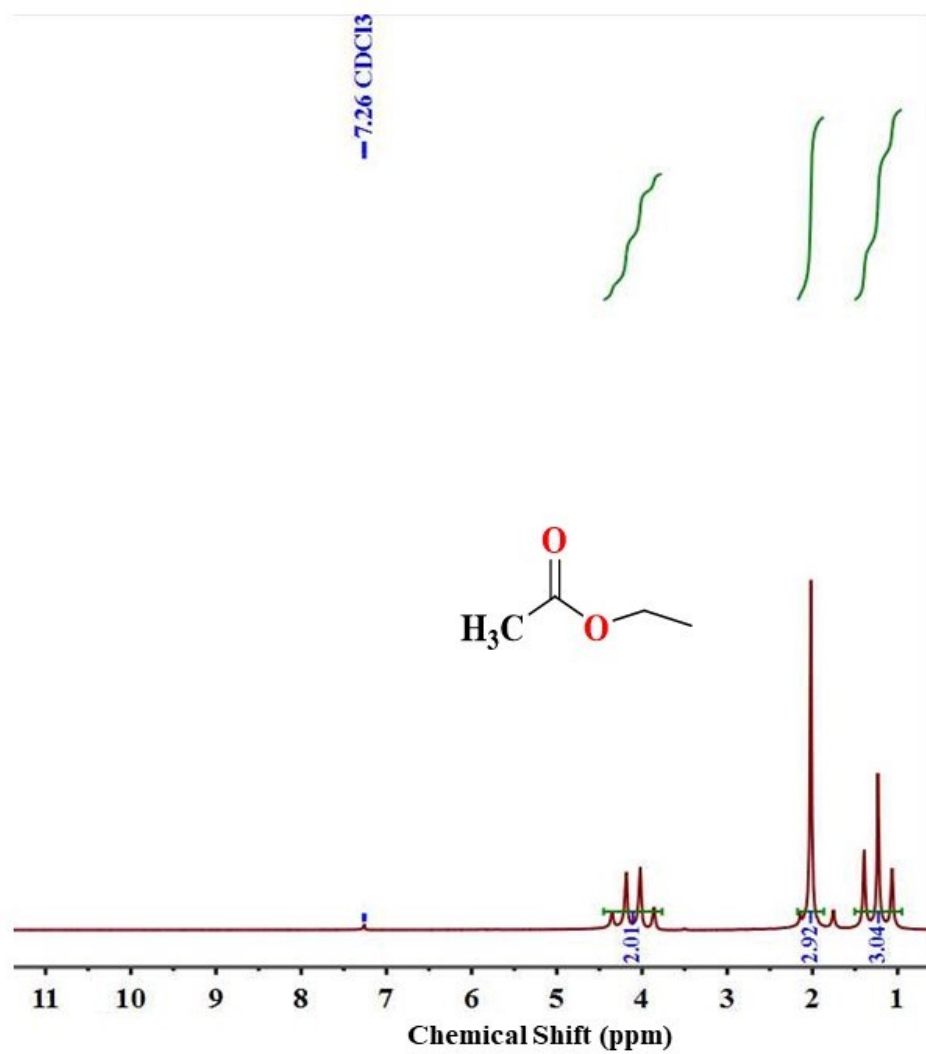

**Figure S32:** <sup>1</sup>H-NMR spectrum of ester formation corresponding to Table 6, entry with acetic acid.

## REFERENCES:

1. R. Fu, S. Xia, S. Xiang, S. Hu and X. Wu, Syntheses, characterization and electrical property of a new silver diphosphonate with zeolite-like framework and three-dimensional silver interactions:  $[Ag_4(O_3PCH_2CH_2PO_3)]$ , *J. Solid State Chem.*, 2004, 4626–4631.
2. A.-G. D. Nelson, Z. Rak, T. E. Albrecht-Schmitt, U. Becker and R. C. Ewing, Three new silver uranyl diphosphonates: structures and properties, *Inorg. Chem.*, 2014, **53**, 2787–2796.
3. X. Hou and S.-F. Tang, Four new silver phosphonates constructed from semi-rigid phosphonate ligands: syntheses, structures and properties, *RSC. Adv.*, 2016, **6**, 100158–100166.
4. Y.-P. Xie and T. C. W. Mak, New synthesis of silver phosphonate complexes from polymeric silver phenylethyne as a structure-directing precursor, *Dalton Trans.*, 2013, **42**, 12869.
5. T. Hu and T. C. W. Mak, Silver(I) multiple salts assembled with phosphonate, perfluorocarboxylate, and the multinuclear silver-ethynediide supramolecular synthon, *Inorg. Chem.*, 2013, **52**, 9066–9076.
6. N. B. Padalwar, B. Akkisetty and K. Vidyasagar, Syntheses and characterization of silver phenylphosphonates and phenylarsonates,  $Ag_xH_{4-x}(O_3PPh)_2$  ( $x = 1-4$ ) and  $Ag_xH_{4-x}(O_3AsPh)_2$  ( $x = 2, 4$ ), *Z. Anorg. Allg. Chem.*, 2014, **640**, 2876–2881.
7. M. Srinu, N. B. Padalwar and K. Vidyasagar, Syntheses and Characterization of 1,4-Phenylenebisphosphonates,  $A[HO_3PC_6H_4PO_3H_2]$  ( $A = Li, K, Rb, Cs, Tl, Ag$  and  $NH_4$ ) and Crystal Structure of 1,4-Phenylenebisphosphonic Acid, *Z. Anorg. Allg. Chem.*, 2015, **641**, 2429–2434.
8. Y.-M. Su, H.-F. Su, Z. Wang, Y.-A. Li, S. Schein, Q.-Q. Zhao, X.-P. Wang, C.-H. Tung, D. Sun and L.-S. Zheng, Three silver nests capped by thiolate/phenylphosphonate, *Chem. Eur. J.*, 2018, **24**, 15096–15103.
9. X. Liang, Y. Chen, L. Wang, F. Zhang, Z.-L. Fan, T. Cao, Y. Cao, H. Zhu, X. He, B. Deng, Y. You, Y. Dong and Y. Zhao, Effect of carbon-skeleton isomerism on the dielectric properties and proton conduction of organic cocrystal compounds assembled from 1,2,4,5-benzenetetracarboxylic acid and piperazine derivatives, *New J. Chem.*, 2019, **43**, 11099.
10. P.-C. Guo, T.-Y. Chen, X.-M. Ren, W.-H. Ning and W. Jin, A low-k dielectric metal–organic-framework compound showing novel three-step dielectric relaxations originating from orientational motion of dipolar guest molecules, *New J. Chem.*, 2014, **38**, 2254.



11. H. Zhang, S.-S. Yu and H.-B. Duan, A hybrid crystal with high dielectric constant and relaxation dielectric behavior, *Inorg. Chem. Commun.*, 2018, **93**, 1–5.
12. R. Kumari, R. Seera, A. De, R. Ranjan and T. N. Guru Row, Organic multifunctional materials: second harmonic, ferroelectric, and dielectric properties in N-Benzylideneaniline analogues, *Cryst. Growth Des.*, 2019, **19**, 5934–5944.
13. B.-T. Qu, J.-C. Lai, S. Liu, F. Liu, Y.-D. Gao and X.-Z. You, Cu- and Ag-based metal–organic frameworks with 4-pyranone-2,6-dicarboxylic acid: syntheses, crystal structures, and dielectric properties, *Cryst. Growth Des.*, 2015, **15**, 1707–1713.
14. C. Xue, Z.-Y. Yao, S.-X. Liu, H.-B. Luo, Y. Zou, L. Li and X.-M. Ren, dielectric anomaly and relaxation natures in a Zn-Cr pillar–layered metal–organic framework with cages and channels, *J. Solid State Chem.*, 2017, **250**, 107–113.
15. S. Bouketaya, A. Elferjani, M. S. M. Abdelbaky, M. Dammak and S. Garcia-Granda, Crystal structure, phase transitions, dielectric and vibrational studies and photoluminescence properties of a new iron fluoride based on bipyridine, *J. Solid State Chem.*, 2019, **277**, 395–405.
16. H.-X. Zhao, J.-X. Liu, L.-S. Long, A. A. Bokov, Z.-G. Ye, R.-B. Huang and L.-S. Zheng, High dielectric constant and relaxation mechanism of water with hydrated copper(II) ions in a cucurbit[8]uril-based supramolecular architecture, *J. Phys. Chem. C.*, 2012, **116**, 14199–14204.
17. Q.-Z. Shi, Z. Xing, Y.-N. Cao, S.-B. Ma and L.-Z. Chen, Synthesis, structure and dielectric properties of a Cd coordination polymer based on homopiperazine, *J. Mol. Struct.*, 2017, **1130**, 363–367.
18. T.-P. Hu, Y.-Q. Zhao, K. Mei, S.-J. Lin, X.-P. Wang and D. A. Sun, A novel silver(I)-keggin-polyoxometalate inorganic–organic hybrid: a Lewis acid catalyst for cyanosilylation reaction, *CrystEngComm.*, 2015, **17**, 5947–5952.
19. S. Li, Y. Zhou, Q. Peng, R. Wang, X. Feng, S. Liu, X. Ma, N. Ma, J. Zhang, Y. Chang, Z. Zheng and X. Chen, Controllable synthesis and catalytic performance of nanocrystals of rare-earth-polyoxometalates, *Inorg. Chem.*, 2018, **57**, 6624–6631.
20. J. M. Moreno, A. Velty, U. Díaz and A. Corma, Synthesis of 2D and 3D MOFs with tuneable Lewis acidity from preformed 1D hybrid sub-domains, *Chem. Sci.*, 2019, **10**, 2053–2066.
21. F.-Z. Jin, C.-C. Zhao, H.-C. Ma, G.-J. Chen and Y.-B. Dong, Homochiral BINAPDA-Zr-MOF for heterogeneous asymmetric cyanosilylation of aldehyde, *Inorg. Chem.* 2019, **58**, 9253–9259.

22. T. Kajiwara, M. Higuchi, A. Yuasa, H. Higashimura and S. Kitagawa, One-dimensional alignment of strong Lewis acid sites in a porous coordination polymer, *Chem. Commun.*, 2013, **49**, 10459–10461.
23. L. Hui, G.-X. Hao, H.-D. Luo, C.-X. Ke, G. Shi, J. Lin, X.-M. Lin, U. Y. Qazi and Y.-P. Cai, Bifunctional 2D Cd(II)-based metal–organic framework as efficient heterogeneous catalyst for the formation of C–C bond, *Cryst. Growth Des.*, 2018, **18**, 2883–2889.
24. X.-M. Lin, J.-L. Niu, P.-X. Wen, Y. Pang, L. Hu and Y.-P. Cai, A polyhedral metal-organic framework based on the supramolecular building block: catalysis and luminescent sensing of solvent molecules, *Cryst. Growth Des.*, 2016, **16**, 4705–4710.
25. J. Chai, P. Zhang, J. Xu, H. Qi, J. Sun, S. Jing, S. Jing, X. Chen, Y. Fan and L. Wang, An in-based 3D metal-organic framework as heterogeneous Lewis acid catalyst for multi-component Strecker reactions, *Inorganica Chimica Acta.*, 2018, **479**, 165–171.
26. D. Deng, H. Guo, G. Kang, L. Ma, X. He and B. Ji, In situ generation of functionality in a reactive binicotinic-acid-based ligand for the design of multi-functional copper(II) complexes: syntheses, structures and properties, *CrystEngComm.*, 2015, **17**, 1871.
27. O. Ohmori and M. Fujita, Heterogeneous catalysis of a coordination network: cyanosilylation of imines catalyzed by a Cd(II)-(4,4'-bipyridine) square grid complex, *Chem. Commun.*, 2004, **1**, 1586–1587.
28. A. K. Paul, U. Sanyal and S. Natarajan, Use of polyazaheterocycles in the assembly of new cadmium sulfate frameworks: synthesis, structure, and properties, *Cryst. Growth Des.*, 2010, **9**, 4161–4175.
29. A. K. Paul, K. Naveen, N. Kumar, R. Kanagaraj, V. M. Vidya and T. Rom, First example of a nonanuclear silver sulfate hybrid cluster: green approach for synthesis of Lewis acid catalyst, *Cryst. Growth Des.*, 2018, **18**, 6411–6416.
30. N. Kumar and A. K. Paul, Triggering Lewis acidic nature through the variation of coordination environment of Cd-Centers in 2D-coordination polymers, *Inorg. Chem.*, 2020, **59**, 1284–1294.
31. A. K. Paul, Synthesis, structure and topological analysis of glycine templated highly stable cadmium sulfate framework: A new Lewis acid catalyst., *J. Mol. Struct.*, 2018, **1157**, 672–678.
32. S. Natarajan and R. Karthik, Interpenetrated and catenated zinc thiosulfates frameworks with dia and qtz nets: synthesis, structure, and properties, *Cryst. Growth Des.*, 2016, **16**, 2239–2248.

33. X. Tan, L. Li, J. Zhang, X. Han, L. Jiang, F. Li and C.-Y. Su, Three-dimensional phosphine metal–organic frameworks assembled from Cu(I) and pyridyl diphosphine, *Chem. Mater.*, 2012, **24**, 480–485.
34. H. Fei, L. Paw U, D. L. Rogow, M. R. Bresler, Y. A. Abdollahian and S. R. J. Oliver, Synthesis, characterization, and catalytic application of a cationic metal-organic framework:  $\text{Ag}_2(4,4'$ -bipy) $_2(\text{O}_3\text{SCH}_2\text{CH}_2\text{SO}_3)$ , *Chem. Mater.*, 2010, **22**, 2027–2032.
